# Supplementary material for: Spectrum of BRCA1 interacting helicase 1 aberrations and potential prognostic and therapeutic implication: a pan cancer analysis
Source: Sci Rep. 2023 Mar 17;13:4435. doi: 10.1038/s41598-023-31109-6 (PMC10023799; doi:10.1038/s41598-023-31109-6)
Supplement: Supplementary file 2 — Supplementary Table S1. [file 41598_2023_31109_MOESM2_ESM.xlsx]

## Sheet: table
Supplementary Table S1. Information from cBioportal about 32 tumor types with 242 BRIP1 somatic mutations.
Study	Sample ID	Cancer Type	Protein Change	Annotation	Functional Impact	Mutation Type	Variant Type	Copy #	COSMIC	MS	VS	Center	Chromosome	Start Pos	End Pos	Ref	Var	HGVSg	HGVSc	Allele Freq (T)	Allele Freq (N)	Variant Reads	Ref Reads	Variant Reads (Normal)	Ref Reads (Normal)	# Mut in Sample	Exon	gnomAD	ClinVar ID	dbSNP
Bladder Urothelial Carcinoma (TCGA, PanCancer Atlas)	TCGA-4Z-AA7Y-01	Bladder Urothelial Carcinoma	S653*	OncoKB: NA;CIViC: NA;MyCancerGenome: not present;CancerHotspot: no;3DHotspot: no	MutationAssessor: NA;SIFT: NA;Polyphen-2: NA	Nonsense_Mutation	SNP	Diploid		.	.	.	17	59853901	59853901	G	C	17:g.59853901G>C	ENST00000259008.2:c.1958C>G	0.44		43	55		94	264	14/20
Bladder Urothelial Carcinoma (TCGA, PanCancer Atlas)	TCGA-BT-A42E-01	Bladder Urothelial Carcinoma	S1056*	OncoKB: NA;CIViC: NA;MyCancerGenome: not present;CancerHotspot: no;3DHotspot: no	MutationAssessor: NA;SIFT: NA;Polyphen-2: NA	Nonsense_Mutation	SNP	Diploid		.	.	.	17	59761240	59761240	G	C	17:g.59761240G>C	ENST00000259008.2:c.3167C>G	0.31		49	110		193	160	20/20		Likely_pathogenic
Bladder Urothelial Carcinoma (TCGA, PanCancer Atlas)	TCGA-2F-A9KR-01	Bladder Urothelial Carcinoma	E1126Kfs*24	OncoKB: NA;CIViC: NA;MyCancerGenome: not present;CancerHotspot: no;3DHotspot: no	MutationAssessor: NA;SIFT: NA;Polyphen-2: NA	Frame_Shift_Del	DEL	Amp		.	.	.	17	59761031	59761031	C	-	17:g.59761031del	ENST00000259008.2:c.3376del	0.25		41	125		68	210	20/20
Bladder Urothelial Carcinoma (TCGA, PanCancer Atlas)	TCGA-KQ-A41N-01	Bladder Urothelial Carcinoma	S805*	OncoKB: NA;CIViC: NA;MyCancerGenome: not present;CancerHotspot: no;3DHotspot: no	MutationAssessor: NA;SIFT: NA;Polyphen-2: NA	Nonsense_Mutation	SNP	Diploid		.	.	.	17	59793390	59793390	G	T	17:g.59793390G>T	ENST00000259008.2:c.2414C>A	0.11		5	41		33	2540	17/20		Pathogenic
Bladder Urothelial Carcinoma (TCGA, PanCancer Atlas)	TCGA-CF-A1HS-01	Bladder Urothelial Carcinoma	E671Q	OncoKB: NA;CIViC: NA;MyCancerGenome: not present;CancerHotspot: no;3DHotspot: no	MutationAssessor: NA;SIFT: impact: tolerated, score: 0.06;Polyphen-2: impact: possibly_damaging, score: 0.806	Missense_Mutation	SNP	Gain	2	.	.	.	17	59853848	59853848	C	G	17:g.59853848C>G	ENST00000259008.2:c.2011G>C	0.04		8	196		187	241	14/20
Bladder Urothelial Carcinoma (TCGA, PanCancer Atlas)	TCGA-BT-A20O-01	Bladder Urothelial Carcinoma	L84M	OncoKB: NA;CIViC: NA;MyCancerGenome: not present;CancerHotspot: no;3DHotspot: no	MutationAssessor: NA;SIFT: impact: tolerated, score: 0.24;Polyphen-2: impact: possibly_damaging, score: 0.873	Missense_Mutation	SNP	Gain	1	.	.	.	17	59934548	59934548	A	T	17:g.59934548A>T	ENST00000259008.2:c.250T>A	0.15		13	76		61	174	44671
Bladder Urothelial Carcinoma (TCGA, PanCancer Atlas)	TCGA-BT-A42C-01	Bladder Urothelial Carcinoma	I640M	OncoKB: NA;CIViC: NA;MyCancerGenome: not present;CancerHotspot: no;3DHotspot: no	MutationAssessor: NA;SIFT: impact: deleterious, score: 0;Polyphen-2: impact: benign, score: 0.182	Missense_Mutation	SNP	Gain		.	.	.	17	59857637	59857637	G	C	17:g.59857637G>C	ENST00000259008.2:c.1920C>G	0.12		12	89		69	345	13/20
Bladder Urothelial Carcinoma (TCGA, PanCancer Atlas)	TCGA-CF-A47X-01	Bladder Urothelial Carcinoma	G270V	OncoKB: NA;CIViC: NA;MyCancerGenome: not present;CancerHotspot: no;3DHotspot: no	MutationAssessor: NA;SIFT: impact: deleterious, score: 0.03;Polyphen-2: impact: possibly_damaging, score: 0.764	Missense_Mutation	SNP	Gain	1	.	.	.	17	59885937	59885937	C	A	17:g.59885937C>A	ENST00000259008.2:c.809G>T	0.04		5	116		74	293	44762
Bladder Urothelial Carcinoma (TCGA, PanCancer Atlas)	TCGA-DK-A3WW-01	Bladder Urothelial Carcinoma	L842V	OncoKB: NA;CIViC: NA;MyCancerGenome: not present;CancerHotspot: no;3DHotspot: no	MutationAssessor: NA;SIFT: impact: deleterious, score: 0.03;Polyphen-2: impact: probably_damaging, score: 0.96	Missense_Mutation	SNP	Diploid	1	.	.	.	17	59770842	59770842	G	C	17:g.59770842G>C	ENST00000259008.2:c.2524C>G	0.27		17	46		65	1084	18/20		Uncertain_significance
Bladder Urothelial Carcinoma (TCGA, PanCancer Atlas)	TCGA-DK-A3X1-01	Bladder Urothelial Carcinoma	D363N	OncoKB: NA;CIViC: NA;MyCancerGenome: not present;CancerHotspot: no;3DHotspot: no	MutationAssessor: NA;SIFT: impact: tolerated, score: 0.07;Polyphen-2: impact: benign, score: 0.073	Missense_Mutation	SNP	Amp	1	.	.	.	17	59878667	59878667	C	T	17:g.59878667C>T	ENST00000259008.2:c.1087G>A	0.1		44	382		197	786	44793
Bladder Urothelial Carcinoma (TCGA, PanCancer Atlas)	TCGA-DK-AA6S-01	Bladder Urothelial Carcinoma	D1051N	OncoKB: NA;CIViC: NA;MyCancerGenome: not present;CancerHotspot: no;3DHotspot: no	MutationAssessor: NA;SIFT: impact: tolerated_low_confidence, score: 1;Polyphen-2: impact: benign, score: 0.018	Missense_Mutation	SNP	Gain		.	.	.	17	59761256	59761256	C	T	17:g.59761256C>T	ENST00000259008.2:c.3151G>A	0.27		46	127		200	532	20/20
Bladder Urothelial Carcinoma (TCGA, PanCancer Atlas)	TCGA-E7-A7DV-01	Bladder Urothelial Carcinoma	D1112H	OncoKB: NA;CIViC: NA;MyCancerGenome: not present;CancerHotspot: no;3DHotspot: no	MutationAssessor: NA;SIFT: impact: tolerated_low_confidence, score: 0.1;Polyphen-2: impact: possibly_damaging, score: 0.579	Missense_Mutation	SNP	Diploid		.	.	.	17	59761073	59761073	C	G	17:g.59761073C>G	ENST00000259008.2:c.3334G>C	0.33		22	45		88	493	20/20
Bladder Urothelial Carcinoma (TCGA, PanCancer Atlas)	TCGA-FD-A3B3-01	Bladder Urothelial Carcinoma	K159E	OncoKB: NA;CIViC: NA;MyCancerGenome: not present;CancerHotspot: no;3DHotspot: no	MutationAssessor: NA;SIFT: impact: deleterious, score: 0;Polyphen-2: impact: possibly_damaging, score: 0.883	Missense_Mutation	SNP	Diploid	1	.	.	.	17	59926522	59926522	T	C	17:g.59926522T>C	ENST00000259008.2:c.475A>G	0.14		15	96		114	164	44701		Uncertain_significance
Bladder Urothelial Carcinoma (TCGA, PanCancer Atlas)	TCGA-FD-A43X-01	Bladder Urothelial Carcinoma	I633M	OncoKB: NA;CIViC: NA;MyCancerGenome: not present;CancerHotspot: no;3DHotspot: no	MutationAssessor: NA;SIFT: impact: deleterious, score: 0;Polyphen-2: impact: possibly_damaging, score: 0.813	Missense_Mutation	SNP	Gain		.	.	.	17	59857658	59857658	G	C	17:g.59857658G>C	ENST00000259008.2:c.1899C>G	0.29		32	80		100	288	13/20		Uncertain_significance
Bladder Urothelial Carcinoma (TCGA, PanCancer Atlas)	TCGA-FD-A6TG-01	Bladder Urothelial Carcinoma	R1157T	OncoKB: NA;CIViC: NA;MyCancerGenome: not present;CancerHotspot: no;3DHotspot: no	MutationAssessor: NA;SIFT: impact: tolerated_low_confidence, score: 0.84;Polyphen-2: impact: benign, score: 0.02	Missense_Mutation	SNP	Amp		.	.	.	17	59760937	59760937	C	G	17:g.59760937C>G	ENST00000259008.2:c.3470G>C	0.18		13	59		64	361	20/20
Bladder Urothelial Carcinoma (TCGA, PanCancer Atlas)	TCGA-G2-A2EJ-01	Bladder Urothelial Carcinoma	E910Q	OncoKB: NA;CIViC: NA;MyCancerGenome: not present;CancerHotspot: no;3DHotspot: no	MutationAssessor: NA;SIFT: impact: tolerated, score: 0.2;Polyphen-2: impact: benign, score: 0.192	Missense_Mutation	SNP	Gain	1	.	.	.	17	59763374	59763374	C	G	17:g.59763374C>G	ENST00000259008.2:c.2728G>C	0.47		93	107		203	540	19/20		Uncertain_significance
Bladder Urothelial Carcinoma (TCGA, PanCancer Atlas)	TCGA-G2-AA3B-01	Bladder Urothelial Carcinoma	R1174T	OncoKB: NA;CIViC: NA;MyCancerGenome: not present;CancerHotspot: no;3DHotspot: no	MutationAssessor: NA;SIFT: impact: tolerated_low_confidence, score: 0.52;Polyphen-2: impact: benign, score: 0.199	Missense_Mutation	SNP	Amp		.	.	.	17	59760886	59760886	C	G	17:g.59760886C>G	ENST00000259008.2:c.3521G>C	0.07		17	218		27	661	20/20		Uncertain_significance
Bladder Urothelial Carcinoma (TCGA, PanCancer Atlas)	TCGA-K4-AAQO-01	Bladder Urothelial Carcinoma	E626K	OncoKB: NA;CIViC: NA;MyCancerGenome: not present;CancerHotspot: no;3DHotspot: no	MutationAssessor: NA;SIFT: impact: deleterious, score: 0;Polyphen-2: impact: probably_damaging, score: 0.999	Missense_Mutation	SNP	Gain		.	.	.	17	59857681	59857681	C	T	17:g.59857681C>T	ENST00000259008.2:c.1876G>A	0.26		31	86		65	232	13/20
Bladder Urothelial Carcinoma (TCGA, PanCancer Atlas)	TCGA-SY-A9G5-01	Bladder Urothelial Carcinoma	S139C	OncoKB: NA;CIViC: NA;MyCancerGenome: not present;CancerHotspot: no;3DHotspot: no	MutationAssessor: NA;SIFT: impact: deleterious, score: 0.05;Polyphen-2: impact: probably_damaging, score: 0.986	Missense_Mutation	SNP	Gain		.	.	.	17	59926581	59926581	G	C	17:g.59926581G>C	ENST00000259008.2:c.416C>G	0.16		18	95		81	928	44701
Bladder Urothelial Carcinoma (TCGA, PanCancer Atlas)	TCGA-XF-A8HE-01	Bladder Urothelial Carcinoma	Q561H	OncoKB: NA;CIViC: NA;MyCancerGenome: not present;CancerHotspot: no;3DHotspot: no	MutationAssessor: NA;SIFT: impact: tolerated, score: 0.1;Polyphen-2: impact: benign, score: 0.012	Missense_Mutation	SNP	Diploid		.	.	.	17	59858312	59858312	C	G	17:g.59858312C>G	ENST00000259008.2:c.1683G>C	0.19		14	59		66	382	44915		Uncertain_significance
Bladder Urothelial Carcinoma (TCGA, PanCancer Atlas)	TCGA-ZF-A9R3-01	Bladder Urothelial Carcinoma	E1172K	OncoKB: NA;CIViC: NA;MyCancerGenome: not present;CancerHotspot: no;3DHotspot: no	MutationAssessor: NA;SIFT: impact: tolerated_low_confidence, score: 0.19;Polyphen-2: impact: benign, score: 0.023	Missense_Mutation	SNP	Amp		.	.	.	17	59760893	59760893	C	T	17:g.59760893C>T	ENST00000259008.2:c.3514G>A	0.88		92	12		45	80	20/20
Bladder Urothelial Carcinoma (TCGA, PanCancer Atlas)	TCGA-K4-A3WU-01	Bladder Urothelial Carcinoma	RHBDF2-BRIP1	OncoKB: NA;CIViC: NA;MyCancerGenome: not present;CancerHotspot: no;3DHotspot: no	MutationAssessor: NA;SIFT: NA;Polyphen-2: NA	fusion	FUSION	Gain				WashU	NA	-1												178
Bladder Urothelial Carcinoma (TCGA, PanCancer Atlas)	TCGA-K4-A3WU-01	Bladder Urothelial Carcinoma	ST6GALNAC2-BRIP1	OncoKB: NA;CIViC: NA;MyCancerGenome: not present;CancerHotspot: no;3DHotspot: no	MutationAssessor: NA;SIFT: NA;Polyphen-2: NA	fusion	FUSION	Gain				WashU	NA	-1												178
Breast Invasive Carcinoma (TCGA, PanCancer Atlas)	TCGA-A8-A06R-01	Invasive Breast Carcinoma	X700_splice	OncoKB: NA;CIViC: NA;MyCancerGenome: not present;CancerHotspot: no;3DHotspot: no	MutationAssessor: NA;SIFT: NA;Polyphen-2: NA	Splice_Site	SNP	ShallowDel		.	.	.	17	59821953	59821953	C	G	17:g.59821953C>G	ENST00000259008.2:c.2098-1G>C	0.23		31	103		295	57
Breast Invasive Carcinoma (TCGA, PanCancer Atlas)	TCGA-E9-A228-01	Invasive Breast Carcinoma	A453T	OncoKB: NA;CIViC: NA;MyCancerGenome: not present;CancerHotspot: no;3DHotspot: no	MutationAssessor: NA;SIFT: impact: tolerated, score: 0.11;Polyphen-2: impact: benign, score: 0	Missense_Mutation	SNP	Gain	2	.	.	.	17	59871074	59871074	C	T	17:g.59871074C>T	ENST00000259008.2:c.1357G>A	0.36		25	44		37	39	44854		Uncertain_significance
Breast Invasive Carcinoma (TCGA, PanCancer Atlas)	TCGA-D8-A1JA-01	Invasive Breast Carcinoma	L134V	OncoKB: NA;CIViC: NA;MyCancerGenome: not present;CancerHotspot: no;3DHotspot: no	MutationAssessor: NA;SIFT: impact: deleterious, score: 0.01;Polyphen-2: impact: probably_damaging, score: 0.96	Missense_Mutation	SNP	Diploid	1	.	.	.	17	59926597	59926597	G	C	17:g.59926597G>C	ENST00000259008.2:c.400C>G	0.4		39	58		109	797	44701
Breast Invasive Carcinoma (TCGA, PanCancer Atlas)	TCGA-E2-A1B5-01	Invasive Breast Carcinoma	L717V	OncoKB: NA;CIViC: NA;MyCancerGenome: not present;CancerHotspot: no;3DHotspot: no	MutationAssessor: NA;SIFT: impact: deleterious, score: 0;Polyphen-2: impact: probably_damaging, score: 0.999	Missense_Mutation	SNP	Amp	1	.	.	.	17	59821901	59821901	G	C	17:g.59821901G>C	ENST00000259008.2:c.2149C>G	0.32		155	323		473	32	15/20
Breast Invasive Carcinoma (TCGA, PanCancer Atlas)	TCGA-AN-A046-01	Invasive Breast Carcinoma	F934V	OncoKB: NA;CIViC: NA;MyCancerGenome: not present;CancerHotspot: no;3DHotspot: no	MutationAssessor: NA;SIFT: impact: deleterious_low_confidence, score: 0.03;Polyphen-2: impact: benign, score: 0.005	Missense_Mutation	SNP	ShallowDel	2	.	.	.	17	59763302	59763302	A	C	17:g.59763302A>C	ENST00000259008.2:c.2800T>G	0.2		40	160		275	5415	19/20		Uncertain_significance
Breast Invasive Carcinoma (TCGA, PanCancer Atlas)	TCGA-A8-A076-01	Invasive Breast Carcinoma	S913F	OncoKB: NA;CIViC: NA;MyCancerGenome: not present;CancerHotspot: no;3DHotspot: no	MutationAssessor: NA;SIFT: impact: tolerated, score: 0.67;Polyphen-2: impact: benign, score: 0.056	Missense_Mutation	SNP	Diploid	1	.	.	.	17	59763364	59763364	G	A	17:g.59763364G>A	ENST00000259008.2:c.2738C>T	0.35		102	191		259	71	19/20
Breast Invasive Carcinoma (TCGA, PanCancer Atlas)	TCGA-E2-A14P-01	Invasive Breast Carcinoma	Q540_S542del	OncoKB: NA;CIViC: NA;MyCancerGenome: not present;CancerHotspot: no;3DHotspot: no	MutationAssessor: NA;SIFT: NA;Polyphen-2: NA	In_Frame_Del	DEL	Gain		.	.	.	17	59861632	59861640	TGCTATTTT	-	17:g.59861632_59861640del	ENST00000259008.2:c.1619_1627del	0.19		50	218		193	63	44885
Breast Invasive Carcinoma (TCGA, PanCancer Atlas)	TCGA-A2-A0CX-01	Invasive Breast Carcinoma	E421Q	OncoKB: NA;CIViC: NA;MyCancerGenome: not present;CancerHotspot: no;3DHotspot: no	MutationAssessor: NA;SIFT: impact: deleterious, score: 0;Polyphen-2: impact: probably_damaging, score: 0.999	Missense_Mutation	SNP	Gain	1	.	.	.	17	59876540	59876540	C	G	17:g.59876540C>G	ENST00000259008.2:c.1261G>C	0.27		97	256		142	250	44824		Uncertain_significance
Breast Invasive Carcinoma (TCGA, PanCancer Atlas)	TCGA-AR-A0TQ-01	Invasive Breast Carcinoma	E421K	OncoKB: NA;CIViC: NA;MyCancerGenome: not present;CancerHotspot: no;3DHotspot: no	MutationAssessor: NA;SIFT: impact: deleterious, score: 0;Polyphen-2: impact: probably_damaging, score: 0.999	Missense_Mutation	SNP	Amp	1	.	.	.	17	59876540	59876540	C	T	17:g.59876540C>T	ENST00000259008.2:c.1261G>A	0.1		36	329		112	32	44824
Breast Invasive Carcinoma (TCGA, PanCancer Atlas)	TCGA-AO-A0J5-01	Invasive Breast Carcinoma	D184N	OncoKB: NA;CIViC: NA;MyCancerGenome: not present;CancerHotspot: no;3DHotspot: no	MutationAssessor: NA;SIFT: impact: deleterious, score: 0.02;Polyphen-2: impact: benign, score: 0.134	Missense_Mutation	SNP	Amp		.	.	.	17	59924539	59924539	C	T	17:g.59924539C>T	ENST00000259008.2:c.550G>A	0.03		18	540		417	53	44732		Uncertain_significance
Breast Invasive Carcinoma (TCGA, PanCancer Atlas)	TCGA-AO-A0J5-01	Invasive Breast Carcinoma	R171T	OncoKB: NA;CIViC: NA;MyCancerGenome: not present;CancerHotspot: no;3DHotspot: no	MutationAssessor: NA;SIFT: impact: deleterious, score: 0;Polyphen-2: impact: possibly_damaging, score: 0.682	Missense_Mutation	SNP	Amp		.	.	.	17	59924577	59924577	C	G	17:g.59924577C>G	ENST00000259008.2:c.512G>C	0.02		11	445		313	53	44732
Breast Invasive Carcinoma (TCGA, PanCancer Atlas)	TCGA-A8-A09I-01	Invasive Breast Carcinoma	BRIP1-UTP18	OncoKB: NA;CIViC: NA;MyCancerGenome: not present;CancerHotspot: no;3DHotspot: no	MutationAssessor: NA;SIFT: NA;Polyphen-2: NA	fusion	FUSION	Gain				WashU	NA	-1												129
Breast Invasive Carcinoma (TCGA, PanCancer Atlas)	TCGA-AO-A0JG-01	Invasive Breast Carcinoma	BRIP1-WFDC21P	OncoKB: NA;CIViC: NA;MyCancerGenome: not present;CancerHotspot: no;3DHotspot: no	MutationAssessor: NA;SIFT: NA;Polyphen-2: NA	fusion	FUSION	Amp				WashU	NA	-1												16
Breast Invasive Carcinoma (TCGA, PanCancer Atlas)	TCGA-AR-A0TQ-01	Invasive Breast Carcinoma	BRIP1-SPAG9	OncoKB: NA;CIViC: NA;MyCancerGenome: not present;CancerHotspot: no;3DHotspot: no	MutationAssessor: NA;SIFT: NA;Polyphen-2: NA	fusion	FUSION	Amp				WashU	NA	-1												32
Breast Invasive Carcinoma (TCGA, PanCancer Atlas)	TCGA-C8-A275-01	Invasive Breast Carcinoma	BRIP1-CUEDC1	OncoKB: NA;CIViC: NA;MyCancerGenome: not present;CancerHotspot: no;3DHotspot: no	MutationAssessor: NA;SIFT: NA;Polyphen-2: NA	fusion	FUSION	Gain				WashU	NA	-1												106
Breast Invasive Carcinoma (TCGA, PanCancer Atlas)	TCGA-A2-A25B-01	Invasive Breast Carcinoma	DDX42-BRIP1	OncoKB: NA;CIViC: NA;MyCancerGenome: not present;CancerHotspot: no;3DHotspot: no	MutationAssessor: NA;SIFT: NA;Polyphen-2: NA	fusion	FUSION	Amp				WashU	NA	-1												98
Breast Invasive Carcinoma (TCGA, PanCancer Atlas)	TCGA-AR-A0TQ-01	Invasive Breast Carcinoma	SPAG9-BRIP1	OncoKB: NA;CIViC: NA;MyCancerGenome: not present;CancerHotspot: no;3DHotspot: no	MutationAssessor: NA;SIFT: NA;Polyphen-2: NA	fusion	FUSION	Amp				WashU	NA	-1												32
Breast Invasive Carcinoma (TCGA, PanCancer Atlas)	TCGA-AR-A0TQ-01	Invasive Breast Carcinoma	GRB7-BRIP1	OncoKB: NA;CIViC: NA;MyCancerGenome: not present;CancerHotspot: no;3DHotspot: no	MutationAssessor: NA;SIFT: NA;Polyphen-2: NA	fusion	FUSION	Amp				WashU	NA	-1												32
Breast Invasive Carcinoma (TCGA, PanCancer Atlas)	TCGA-C8-A12P-01	Invasive Breast Carcinoma	BCAS3-BRIP1	OncoKB: NA;CIViC: NA;MyCancerGenome: not present;CancerHotspot: no;3DHotspot: no	MutationAssessor: NA;SIFT: NA;Polyphen-2: NA	fusion	FUSION	Amp				WashU	NA	-1												142
Cervical Squamous Cell Carcinoma (TCGA, PanCancer Atlas)	TCGA-EA-A410-01	Cervical Squamous Cell Carcinoma	R439*	OncoKB: NA;CIViC: NA;MyCancerGenome: not present;CancerHotspot: no;3DHotspot: no	MutationAssessor: NA;SIFT: NA;Polyphen-2: NA	Nonsense_Mutation	SNP	Diploid		.	.	.	17	59876486	59876486	G	A	17:g.59876486G>A	ENST00000259008.2:c.1315C>T	0.42		25	35		41	1471	44824		Pathogenic
Cervical Squamous Cell Carcinoma (TCGA, PanCancer Atlas)	TCGA-FU-A3HZ-01	Cervical Squamous Cell Carcinoma	X127_splice	OncoKB: NA;CIViC: NA;MyCancerGenome: not present;CancerHotspot: no;3DHotspot: no	MutationAssessor: NA;SIFT: NA;Polyphen-2: NA	Splice_Site	SNP	Diploid		.	.	.	17	59934417	59934417	A	C	17:g.59934417A>C	ENST00000259008.2:c.379+2T>G	0.36		16	29		63	1896
Cervical Squamous Cell Carcinoma (TCGA, PanCancer Atlas)	TCGA-ZJ-AAXT-01	Cervical Squamous Cell Carcinoma	R416W	OncoKB: NA;CIViC: NA;MyCancerGenome: not present;CancerHotspot: no;3DHotspot: no	MutationAssessor: NA;SIFT: impact: tolerated, score: 0.13;Polyphen-2: impact: benign, score: 0.048	Missense_Mutation	SNP	Diploid		.	.	.	17	59876555	59876555	G	A	17:g.59876555G>A	ENST00000259008.2:c.1246C>T	0.39		24	37		36	144	44824		Uncertain_significance
Cervical Squamous Cell Carcinoma (TCGA, PanCancer Atlas)	TCGA-JW-A5VL-01	Cervical Squamous Cell Carcinoma	D1153H	OncoKB: NA;CIViC: NA;MyCancerGenome: not present;CancerHotspot: no;3DHotspot: no	MutationAssessor: NA;SIFT: impact: deleterious_low_confidence, score: 0.02;Polyphen-2: impact: benign, score: 0.152	Missense_Mutation	SNP	Diploid		.	.	.	17	59760950	59760950	C	G	17:g.59760950C>G	ENST00000259008.2:c.3457G>C	0.38		18	29		33	1879	20/20
Cervical Squamous Cell Carcinoma (TCGA, PanCancer Atlas)	TCGA-EK-A2PM-01	Cervical Squamous Cell Carcinoma	E1144K	OncoKB: NA;CIViC: NA;MyCancerGenome: not present;CancerHotspot: no;3DHotspot: no	MutationAssessor: NA;SIFT: impact: deleterious_low_confidence, score: 0.02;Polyphen-2: impact: benign, score: 0.106	Missense_Mutation	SNP	Gain		.	.	.	17	59760977	59760977	C	T	17:g.59760977C>T	ENST00000259008.2:c.3430G>A	0.44		24	31		58	268	20/20
Cervical Squamous Cell Carcinoma (TCGA, PanCancer Atlas)	TCGA-Q1-A73O-01	Cervical Squamous Cell Carcinoma	E731Q	OncoKB: NA;CIViC: NA;MyCancerGenome: not present;CancerHotspot: no;3DHotspot: no	MutationAssessor: NA;SIFT: impact: tolerated, score: 0.22;Polyphen-2: impact: probably_damaging, score: 0.92	Missense_Mutation	SNP	Diploid		.	.	.	17	59821859	59821859	C	G	17:g.59821859C>G	ENST00000259008.2:c.2191G>C	0.16		8	42		39	1307	15/20
Cervical Squamous Cell Carcinoma (TCGA, PanCancer Atlas)	TCGA-VS-A94X-01	Cervical Squamous Cell Carcinoma	R808K	OncoKB: NA;CIViC: NA;MyCancerGenome: not present;CancerHotspot: no;3DHotspot: no	MutationAssessor: NA;SIFT: impact: tolerated, score: 0.06;Polyphen-2: impact: benign, score: 0.149	Missense_Mutation	SNP	Gain		.	.	.	17	59793381	59793381	C	T	17:g.59793381C>T	ENST00000259008.2:c.2423G>A	0.45		72	89		128	270	17/20
Cervical Squamous Cell Carcinoma (TCGA, PanCancer Atlas)	TCGA-ZJ-AAXU-01	Cervical Squamous Cell Carcinoma	R403W	OncoKB: NA;CIViC: NA;MyCancerGenome: not present;CancerHotspot: no;3DHotspot: no	MutationAssessor: NA;SIFT: impact: deleterious, score: 0;Polyphen-2: impact: probably_damaging, score: 1	Missense_Mutation	SNP	Diploid	1	.	.	.	17	59876594	59876594	G	A	17:g.59876594G>A	ENST00000259008.2:c.1207C>T	0.26		14	40		70	364	44824		Uncertain_significance
Cervical Squamous Cell Carcinoma (TCGA, PanCancer Atlas)	TCGA-VS-A9V3-01	Cervical Squamous Cell Carcinoma	S1129C	OncoKB: NA;CIViC: NA;MyCancerGenome: not present;CancerHotspot: no;3DHotspot: no	MutationAssessor: NA;SIFT: impact: deleterious_low_confidence, score: 0.01;Polyphen-2: impact: benign, score: 0.386	Missense_Mutation	SNP	ShallowDel	1	.	.	.	17	59761021	59761021	G	C	17:g.59761021G>C	ENST00000259008.2:c.3386C>G	0.1		3	27		27	152	20/20
Colorectal Adenocarcinoma (TCGA, PanCancer Atlas)	TCGA-A6-3807-01	Colorectal Adenocarcinoma	S1117*	OncoKB: NA;CIViC: NA;MyCancerGenome: not present;CancerHotspot: no;3DHotspot: no	MutationAssessor: NA;SIFT: NA;Polyphen-2: NA	Nonsense_Mutation	SNP	Diploid	1	.	.	.	17	59761057	59761057	G	C	17:g.59761057G>C	ENST00000259008.2:c.3350C>G	0.21		163	605		187	90	20/20
Colorectal Adenocarcinoma (TCGA, PanCancer Atlas)	TCGA-AZ-4315-01	Colorectal Adenocarcinoma	E357*	OncoKB: NA;CIViC: NA;MyCancerGenome: not present;CancerHotspot: no;3DHotspot: no	MutationAssessor: NA;SIFT: NA;Polyphen-2: NA	Nonsense_Mutation	SNP	Diploid	1	.	.	.	17	59878685	59878685	C	A	17:g.59878685C>A	ENST00000259008.2:c.1069G>T	0.32		41	89		272	6334	44793		Pathogenic
Colorectal Adenocarcinoma (TCGA, PanCancer Atlas)	TCGA-AA-3496-01	Colorectal Adenocarcinoma	I504Nfs*7	OncoKB: NA;CIViC: NA;MyCancerGenome: not present;CancerHotspot: no;3DHotspot: no	MutationAssessor: NA;SIFT: NA;Polyphen-2: NA	Frame_Shift_Ins	INS	Gain	1	.	.	.	17	59861748	59861749	-	T	17:g.59861748_59861749insT	ENST00000259008.2:c.1510dup	0.43		173	233		145	145	44885		Pathogenic/Likely_pathogenic
Colorectal Adenocarcinoma (TCGA, PanCancer Atlas)	TCGA-DT-5265-01	Colorectal Adenocarcinoma	Q227*	OncoKB: NA;CIViC: NA;MyCancerGenome: not present;CancerHotspot: no;3DHotspot: no	MutationAssessor: NA;SIFT: NA;Polyphen-2: NA	Nonsense_Mutation	SNP	ShallowDel	1	.	.	.	17	59886067	59886067	G	A	17:g.59886067G>A	ENST00000259008.2:c.679C>T	0.59		45	31		190	83	44762		Pathogenic
Colorectal Adenocarcinoma (TCGA, PanCancer Atlas)	TCGA-AG-A002-01	Colorectal Adenocarcinoma	K950T	OncoKB: NA;CIViC: NA;MyCancerGenome: not present;CancerHotspot: no;3DHotspot: no	MutationAssessor: NA;SIFT: impact: tolerated_low_confidence, score: 0.43;Polyphen-2: impact: benign, score: 0.007	Missense_Mutation	SNP	Diploid	1	.	.	.	17	59763253	59763253	T	G	17:g.59763253T>G	ENST00000259008.2:c.2849A>C	0.42		143	194		292	11471	19/20
Colorectal Adenocarcinoma (TCGA, PanCancer Atlas)	TCGA-EI-6917-01	Colorectal Adenocarcinoma	S624L	OncoKB: NA;CIViC: NA;MyCancerGenome: not present;CancerHotspot: no;3DHotspot: no	MutationAssessor: NA;SIFT: impact: deleterious, score: 0;Polyphen-2: impact: probably_damaging, score: 0.999	Missense_Mutation	SNP	Diploid	3	.	.	.	17	59857686	59857686	G	A	17:g.59857686G>A	ENST00000259008.2:c.1871C>T	0.22		17	59		124	4949	13/20		Uncertain_significance
Colorectal Adenocarcinoma (TCGA, PanCancer Atlas)	TCGA-AA-A00N-01	Colorectal Adenocarcinoma	S624L	OncoKB: NA;CIViC: NA;MyCancerGenome: not present;CancerHotspot: no;3DHotspot: no	MutationAssessor: NA;SIFT: impact: deleterious, score: 0;Polyphen-2: impact: probably_damaging, score: 0.999	Missense_Mutation	SNP	Diploid	3	.	.	.	17	59857686	59857686	G	A	17:g.59857686G>A	ENST00000259008.2:c.1871C>T	0.16		39	212		48	4895	13/20		Uncertain_significance
Colorectal Adenocarcinoma (TCGA, PanCancer Atlas)	TCGA-AA-3947-01	Colorectal Adenocarcinoma	S876N	OncoKB: NA;CIViC: NA;MyCancerGenome: not present;CancerHotspot: no;3DHotspot: no	MutationAssessor: NA;SIFT: impact: tolerated, score: 0.22;Polyphen-2: impact: probably_damaging, score: 0.959	Missense_Mutation	SNP	Diploid	1	.	.	.	17	59763475	59763475	C	T	17:g.59763475C>T	ENST00000259008.2:c.2627G>A	0.16		32	169		235	2301	19/20		Conflicting_interpretations_of_pathogenicity(Likely_benign(1),Uncertain_significance(1))
Colorectal Adenocarcinoma (TCGA, PanCancer Atlas)	TCGA-AA-3977-01	Colorectal Adenocarcinoma	S1129Y	OncoKB: NA;CIViC: NA;MyCancerGenome: not present;CancerHotspot: no;3DHotspot: no	MutationAssessor: NA;SIFT: impact: deleterious_low_confidence, score: 0;Polyphen-2: impact: probably_damaging, score: 0.99	Missense_Mutation	SNP	Diploid	1	.	.	.	17	59761021	59761021	G	T	17:g.59761021G>T	ENST00000259008.2:c.3386C>A	0.16		15	80		53	3455	20/20		Uncertain_significance
Colorectal Adenocarcinoma (TCGA, PanCancer Atlas)	TCGA-AA-3977-01	Colorectal Adenocarcinoma	R798Q	OncoKB: NA;CIViC: NA;MyCancerGenome: not present;CancerHotspot: no;3DHotspot: no	MutationAssessor: NA;SIFT: impact: tolerated, score: 0.06;Polyphen-2: impact: possibly_damaging, score: 0.896	Missense_Mutation	SNP	Diploid	1	.	.	.	17	59793411	59793411	C	T	17:g.59793411C>T	ENST00000259008.2:c.2393G>A	0.38		28	45		23	3455	17/20		Uncertain_significance
Colorectal Adenocarcinoma (TCGA, PanCancer Atlas)	TCGA-AA-3984-01	Colorectal Adenocarcinoma	Y353C	OncoKB: NA;CIViC: NA;MyCancerGenome: not present;CancerHotspot: no;3DHotspot: no	MutationAssessor: NA;SIFT: impact: deleterious, score: 0;Polyphen-2: impact: probably_damaging, score: 1	Missense_Mutation	SNP	Diploid	1	.	.	.	17	59878696	59878696	T	C	17:g.59878696T>C	ENST00000259008.2:c.1058A>G	0.19		35	148		215	5138	44793
Colorectal Adenocarcinoma (TCGA, PanCancer Atlas)	TCGA-CA-6717-01	Colorectal Adenocarcinoma	S1007Y	OncoKB: NA;CIViC: NA;MyCancerGenome: not present;CancerHotspot: no;3DHotspot: no	MutationAssessor: NA;SIFT: impact: tolerated_low_confidence, score: 1;Polyphen-2: impact: possibly_damaging, score: 0.481	Missense_Mutation	SNP	Diploid	1	.	.	.	17	59761387	59761387	G	T	17:g.59761387G>T	ENST00000259008.2:c.3020C>A	0.21		10	38		43	9618	20/20		Uncertain_significance
Colorectal Adenocarcinoma (TCGA, PanCancer Atlas)	TCGA-CA-6717-01	Colorectal Adenocarcinoma	A496V	OncoKB: NA;CIViC: NA;MyCancerGenome: not present;CancerHotspot: no;3DHotspot: no	MutationAssessor: NA;SIFT: impact: deleterious, score: 0.01;Polyphen-2: impact: possibly_damaging, score: 0.516	Missense_Mutation	SNP	Diploid	1	.	.	.	17	59861772	59861772	G	A	17:g.59861772G>A	ENST00000259008.2:c.1487C>T	0.12		16	121		153	9618	44885		Uncertain_significance
Colorectal Adenocarcinoma (TCGA, PanCancer Atlas)	TCGA-A6-5665-01	Colorectal Adenocarcinoma	L343M	OncoKB: NA;CIViC: NA;MyCancerGenome: not present;CancerHotspot: no;3DHotspot: no	MutationAssessor: NA;SIFT: impact: deleterious, score: 0.01;Polyphen-2: impact: probably_damaging, score: 0.988	Missense_Mutation	SNP	Diploid	1	.	.	.	17	59878727	59878727	G	T	17:g.59878727G>T	ENST00000259008.2:c.1027C>A	0.36		81	146		346	1867	44793
Colorectal Adenocarcinoma (TCGA, PanCancer Atlas)	TCGA-A6-6781-01	Colorectal Adenocarcinoma	Q685P	OncoKB: NA;CIViC: NA;MyCancerGenome: not present;CancerHotspot: no;3DHotspot: no	MutationAssessor: NA;SIFT: impact: deleterious, score: 0;Polyphen-2: impact: probably_damaging, score: 0.972	Missense_Mutation	SNP	Diploid	1	.	.	.	17	59853805	59853805	T	G	17:g.59853805T>G	ENST00000259008.2:c.2054A>C	0.24		51	166		209	1923	14/20
Colorectal Adenocarcinoma (TCGA, PanCancer Atlas)	TCGA-AA-3811-01	Colorectal Adenocarcinoma	Y748C	OncoKB: NA;CIViC: NA;MyCancerGenome: not present;CancerHotspot: no;3DHotspot: no	MutationAssessor: NA;SIFT: impact: tolerated, score: 0.23;Polyphen-2: impact: benign, score: 0.012	Missense_Mutation	SNP	ShallowDel		.	.	.	17	59821807	59821807	T	C	17:g.59821807T>C	ENST00000259008.2:c.2243A>G	0.07		14	181		162	1921	15/20
Colorectal Adenocarcinoma (TCGA, PanCancer Atlas)	TCGA-AA-3811-01	Colorectal Adenocarcinoma	F312del	OncoKB: NA;CIViC: NA;MyCancerGenome: not present;CancerHotspot: no;3DHotspot: no	MutationAssessor: NA;SIFT: NA;Polyphen-2: NA	In_Frame_Del	DEL	ShallowDel		.	.	.	17	59878817	59878819	AAA	-	17:g.59878817_59878819del	ENST00000259008.2:c.935_937del	0.12		32	244		193	1921	44793
Colorectal Adenocarcinoma (TCGA, PanCancer Atlas)	TCGA-AA-3984-01	Colorectal Adenocarcinoma	E1071D	OncoKB: NA;CIViC: NA;MyCancerGenome: not present;CancerHotspot: no;3DHotspot: no	MutationAssessor: NA;SIFT: impact: tolerated_low_confidence, score: 0.13;Polyphen-2: impact: possibly_damaging, score: 0.693	Missense_Mutation	SNP	Diploid		.	.	.	17	59761194	59761194	T	A	17:g.59761194T>A	ENST00000259008.2:c.3213A>T	0.12		26	195		230	5138	20/20
Colorectal Adenocarcinoma (TCGA, PanCancer Atlas)	TCGA-AZ-4315-01	Colorectal Adenocarcinoma	D1208G	OncoKB: NA;CIViC: NA;MyCancerGenome: not present;CancerHotspot: no;3DHotspot: no	MutationAssessor: NA;SIFT: impact: tolerated_low_confidence, score: 0.64;Polyphen-2: impact: benign, score: 0.346	Missense_Mutation	SNP	Diploid	1	.	.	.	17	59760784	59760784	T	C	17:g.59760784T>C	ENST00000259008.2:c.3623A>G	0.25		24	71		404	6334	20/20
Colorectal Adenocarcinoma (TCGA, PanCancer Atlas)	TCGA-AZ-4315-01	Colorectal Adenocarcinoma	F934C	OncoKB: NA;CIViC: NA;MyCancerGenome: not present;CancerHotspot: no;3DHotspot: no	MutationAssessor: NA;SIFT: impact: deleterious_low_confidence, score: 0.01;Polyphen-2: impact: benign, score: 0.16	Missense_Mutation	SNP	Diploid	2	.	.	.	17	59763301	59763301	A	C	17:g.59763301A>C	ENST00000259008.2:c.2801T>G	0.28		54	140		540	6334	19/20
Colorectal Adenocarcinoma (TCGA, PanCancer Atlas)	TCGA-CM-6161-01	Colorectal Adenocarcinoma	D1138G	OncoKB: NA;CIViC: NA;MyCancerGenome: not present;CancerHotspot: no;3DHotspot: no	MutationAssessor: NA;SIFT: impact: deleterious_low_confidence, score: 0;Polyphen-2: impact: probably_damaging, score: 1	Missense_Mutation	SNP	Diploid		.	.	.	17	59760994	59760994	T	C	17:g.59760994T>C	ENST00000259008.2:c.3413A>G	0.31	0.0064	45	98	1	155	79	20/20		Uncertain_significance
Colorectal Adenocarcinoma (TCGA, PanCancer Atlas)	TCGA-D5-6922-01	Colorectal Adenocarcinoma	M620R	OncoKB: NA;CIViC: NA;MyCancerGenome: not present;CancerHotspot: no;3DHotspot: no	MutationAssessor: NA;SIFT: impact: deleterious, score: 0;Polyphen-2: impact: probably_damaging, score: 0.956	Missense_Mutation	SNP	Diploid	3	.	.	.	17	59857698	59857698	A	C	17:g.59857698A>C	ENST00000259008.2:c.1859T>G	0.46		60	71		171	96	13/20
Colorectal Adenocarcinoma (TCGA, PanCancer Atlas)	TCGA-F4-6570-01	Colorectal Adenocarcinoma	V1060I	OncoKB: NA;CIViC: NA;MyCancerGenome: not present;CancerHotspot: no;3DHotspot: no	MutationAssessor: NA;SIFT: impact: tolerated_low_confidence, score: 0.3;Polyphen-2: impact: benign, score: 0.012	Missense_Mutation	SNP	Diploid	1	.	.	.	17	59761229	59761229	C	T	17:g.59761229C>T	ENST00000259008.2:c.3178G>A	0.3		47	108		109	1646	20/20		Uncertain_significance
Colorectal Adenocarcinoma (TCGA, PanCancer Atlas)	TCGA-EI-6917-01	Colorectal Adenocarcinoma	I430V	OncoKB: NA;CIViC: NA;MyCancerGenome: not present;CancerHotspot: no;3DHotspot: no	MutationAssessor: NA;SIFT: impact: tolerated, score: 0.07;Polyphen-2: impact: benign, score: 0.027	Missense_Mutation	SNP	Diploid	1	.	.	.	17	59876513	59876513	T	C	17:g.59876513T>C	ENST00000259008.2:c.1288A>G	0.28		21	55		72	4949	44824		Uncertain_significance
Colorectal Adenocarcinoma (TCGA, PanCancer Atlas)	TCGA-F5-6813-01	Colorectal Adenocarcinoma	S1089C	OncoKB: NA;CIViC: NA;MyCancerGenome: not present;CancerHotspot: no;3DHotspot: no	MutationAssessor: NA;SIFT: impact: deleterious_low_confidence, score: 0.04;Polyphen-2: impact: benign, score: 0.017	Missense_Mutation	SNP	Diploid	1	.	.	.	17	59761141	59761141	G	C	17:g.59761141G>C	ENST00000259008.2:c.3266C>G	0.13		18	120		118	125	20/20		Uncertain_significance
Esophageal Adenocarcinoma (TCGA, PanCancer Atlas)	TCGA-L5-A4OE-01	Esophagogastric Adenocarcinoma	Q126*	OncoKB: NA;CIViC: NA;MyCancerGenome: not present;CancerHotspot: no;3DHotspot: no	MutationAssessor: NA;SIFT: NA;Polyphen-2: NA	Nonsense_Mutation	SNP	Gain		.	.	.	17	59934422	59934422	G	A	17:g.59934422G>A	ENST00000259008.2:c.376C>T	0.35		22	40		103	268	44671
Esophageal Adenocarcinoma (TCGA, PanCancer Atlas)	TCGA-VR-A8EZ-01	Esophageal Squamous Cell Carcinoma	C332S	OncoKB: NA;CIViC: NA;MyCancerGenome: not present;CancerHotspot: no;3DHotspot: no	MutationAssessor: NA;SIFT: impact: tolerated, score: 0.58;Polyphen-2: impact: benign, score: 0.012	Missense_Mutation	SNP	Gain		.	.	.	17	59878759	59878759	C	G	17:g.59878759C>G	ENST00000259008.2:c.995G>C	0.17		11	55		67	142	44793
Esophageal Adenocarcinoma (TCGA, PanCancer Atlas)	TCGA-IG-A5B8-01	Esophageal Squamous Cell Carcinoma	G12E	OncoKB: NA;CIViC: NA;MyCancerGenome: not present;CancerHotspot: no;3DHotspot: no	MutationAssessor: NA;SIFT: impact: deleterious, score: 0;Polyphen-2: impact: probably_damaging, score: 1	Missense_Mutation	SNP	Gain		.	.	.	17	59938866	59938866	C	T	17:g.59938866C>T	ENST00000259008.2:c.35G>A	0.52		16	15		21	235	44612		Uncertain_significance
Esophageal Adenocarcinoma (TCGA, PanCancer Atlas)	TCGA-L5-A43I-01	Esophagogastric Adenocarcinoma	Q491K	OncoKB: NA;CIViC: NA;MyCancerGenome: not present;CancerHotspot: no;3DHotspot: no	MutationAssessor: NA;SIFT: impact: tolerated, score: 0.21;Polyphen-2: impact: probably_damaging, score: 0.974	Missense_Mutation	SNP	Gain		.	.	.	17	59870960	59870960	G	T	17:g.59870960G>T	ENST00000259008.2:c.1471C>A	0.06		3	49		29	176	44854
Glioblastoma Multiforme (TCGA, PanCancer Atlas)	TCGA-19-5956-01	Glioblastoma	G1155*	OncoKB: NA;CIViC: NA;MyCancerGenome: not present;CancerHotspot: no;3DHotspot: no	MutationAssessor: NA;SIFT: NA;Polyphen-2: NA	Nonsense_Mutation	SNP	Diploid		.	.	.	17	59760944	59760944	C	A	17:g.59760944C>A	ENST00000259008.2:c.3463G>T	0.07		6	74		81	6914	20/20
Glioblastoma Multiforme (TCGA, PanCancer Atlas)	TCGA-19-5956-01	Glioblastoma	A349T	OncoKB: NA;CIViC: NA;MyCancerGenome: not present;CancerHotspot: no;3DHotspot: no	MutationAssessor: NA;SIFT: impact: deleterious, score: 0.03;Polyphen-2: impact: possibly_damaging, score: 0.571	Missense_Mutation	SNP	Diploid		.	.	.	17	59878709	59878709	C	T	17:g.59878709C>T	ENST00000259008.2:c.1045G>A	0.48		136	146		287	6914	44793		Uncertain_significance
Glioblastoma Multiforme (TCGA, PanCancer Atlas)	TCGA-19-5956-01	Glioblastoma	S624L	OncoKB: NA;CIViC: NA;MyCancerGenome: not present;CancerHotspot: no;3DHotspot: no	MutationAssessor: NA;SIFT: impact: deleterious, score: 0;Polyphen-2: impact: probably_damaging, score: 0.999	Missense_Mutation	SNP	Diploid	3	.	.	.	17	59857686	59857686	G	A	17:g.59857686G>A	ENST00000259008.2:c.1871C>T	0.32		34	71		109	6914	13/20		Uncertain_significance
Glioblastoma Multiforme (TCGA, PanCancer Atlas)	TCGA-19-1389-01	Glioblastoma	E967K	OncoKB: NA;CIViC: NA;MyCancerGenome: not present;CancerHotspot: no;3DHotspot: no	MutationAssessor: NA;SIFT: impact: tolerated_low_confidence, score: 0.95;Polyphen-2: impact: benign, score: 0.012	Missense_Mutation	SNP	Diploid		.	.	.	17	59763203	59763203	C	T	17:g.59763203C>T	ENST00000259008.2:c.2899G>A	0.29		13	32		173	267	19/20		Uncertain_significance
Glioblastoma Multiforme (TCGA, PanCancer Atlas)	TCGA-19-5956-01	Glioblastoma	V725I	OncoKB: NA;CIViC: NA;MyCancerGenome: not present;CancerHotspot: no;3DHotspot: no	MutationAssessor: NA;SIFT: impact: tolerated, score: 0.15;Polyphen-2: impact: benign, score: 0.041	Missense_Mutation	SNP	Diploid		.	.	.	17	59821877	59821877	C	T	17:g.59821877C>T	ENST00000259008.2:c.2173G>A	0.47		109	125		227	6914	15/20		Uncertain_significance
Head and Neck Squamous Cell Carcinoma (TCGA, PanCancer Atlas)	TCGA-CN-A49A-01	Head and Neck Squamous Cell Carcinoma	S618*	OncoKB: NA;CIViC: NA;MyCancerGenome: not present;CancerHotspot: no;3DHotspot: no	MutationAssessor: NA;SIFT: NA;Polyphen-2: NA	Nonsense_Mutation	SNP	Diploid		.	.	.	17	59857704	59857704	G	C	17:g.59857704G>C	ENST00000259008.2:c.1853C>G	0.27		15	41		42	105	13/20
Head and Neck Squamous Cell Carcinoma (TCGA, PanCancer Atlas)	TCGA-F7-A61V-01	Head and Neck Squamous Cell Carcinoma	X831_splice	OncoKB: NA;CIViC: NA;MyCancerGenome: not present;CancerHotspot: no;3DHotspot: no	MutationAssessor: NA;SIFT: NA;Polyphen-2: NA	Splice_Site	SNP	Diploid		.	.	.	17	59770874	59770874	C	G	17:g.59770874C>G	ENST00000259008.2:c.2493-1G>C	0.19		12	50		46	95			Likely_pathogenic
Head and Neck Squamous Cell Carcinoma (TCGA, PanCancer Atlas)	TCGA-CV-A6K1-01	Head and Neck Squamous Cell Carcinoma	S123L	OncoKB: NA;CIViC: NA;MyCancerGenome: not present;CancerHotspot: no;3DHotspot: no	MutationAssessor: NA;SIFT: impact: tolerated, score: 0.44;Polyphen-2: impact: benign, score: 0.01	Missense_Mutation	SNP	Diploid		.	.	.	17	59934430	59934430	G	A	17:g.59934430G>A	ENST00000259008.2:c.368C>T	0.27		43	117		106	457	44671
Head and Neck Squamous Cell Carcinoma (TCGA, PanCancer Atlas)	TCGA-CV-A463-01	Head and Neck Squamous Cell Carcinoma	A745T	OncoKB: NA;CIViC: NA;MyCancerGenome: not present;CancerHotspot: no;3DHotspot: no	MutationAssessor: NA;SIFT: impact: deleterious, score: 0.02;Polyphen-2: impact: probably_damaging, score: 0.956	Missense_Mutation	SNP	Diploid	4	.	.	.	17	59821817	59821817	C	T	17:g.59821817C>T	ENST00000259008.2:c.2233G>A	0.26		54	157		247	191	15/20		Uncertain_significance
Head and Neck Squamous Cell Carcinoma (TCGA, PanCancer Atlas)	TCGA-QK-A6VB-01	Head and Neck Squamous Cell Carcinoma	R264W	OncoKB: NA;CIViC: NA;MyCancerGenome: not present;CancerHotspot: no;3DHotspot: no	MutationAssessor: NA;SIFT: impact: deleterious, score: 0;Polyphen-2: impact: probably_damaging, score: 0.992	Missense_Mutation	SNP	Gain		.	.	.	17	59885956	59885956	G	A	17:g.59885956G>A	ENST00000259008.2:c.790C>T	0.23		34	117		130	426	44762		Conflicting_interpretations_of_pathogenicity(Benign(1),Likely_benign(12),Uncertain_significance(1))
Head and Neck Squamous Cell Carcinoma (TCGA, PanCancer Atlas)	TCGA-BA-5559-01	Head and Neck Squamous Cell Carcinoma	T411A	OncoKB: NA;CIViC: NA;MyCancerGenome: not present;CancerHotspot: no;3DHotspot: no	MutationAssessor: NA;SIFT: impact: deleterious, score: 0.01;Polyphen-2: impact: possibly_damaging, score: 0.684	Missense_Mutation	SNP	ShallowDel		.	.	.	17	59876570	59876570	T	C	17:g.59876570T>C	ENST00000259008.2:c.1231A>G	0.21		38	142		169	64	44824
Head and Neck Squamous Cell Carcinoma (TCGA, PanCancer Atlas)	TCGA-KU-A66T-01	Head and Neck Squamous Cell Carcinoma	S309Y	OncoKB: NA;CIViC: NA;MyCancerGenome: not present;CancerHotspot: no;3DHotspot: no	MutationAssessor: NA;SIFT: impact: deleterious, score: 0;Polyphen-2: impact: probably_damaging, score: 0.924	Missense_Mutation	SNP	Diploid		.	.	.	17	59878828	59878828	G	T	17:g.59878828G>T	ENST00000259008.2:c.926C>A	0.2		19	76		96	97	44793
Head and Neck Squamous Cell Carcinoma (TCGA, PanCancer Atlas)	TCGA-T3-A92M-01	Head and Neck Squamous Cell Carcinoma	E150K	OncoKB: NA;CIViC: NA;MyCancerGenome: not present;CancerHotspot: no;3DHotspot: no	MutationAssessor: NA;SIFT: impact: deleterious, score: 0.05;Polyphen-2: impact: benign, score: 0.073	Missense_Mutation	SNP	Diploid		.	.	.	17	59926549	59926549	C	T	17:g.59926549C>T	ENST00000259008.2:c.448G>A	0.15		14	77		99	312	44701
Head and Neck Squamous Cell Carcinoma (TCGA, PanCancer Atlas)	TCGA-CR-5248-01	Head and Neck Squamous Cell Carcinoma	D280N	OncoKB: NA;CIViC: NA;MyCancerGenome: not present;CancerHotspot: no;3DHotspot: no	MutationAssessor: NA;SIFT: impact: deleterious, score: 0;Polyphen-2: impact: probably_damaging, score: 1	Missense_Mutation	SNP	Diploid		.	.	.	17	59885908	59885908	C	T	17:g.59885908C>T	ENST00000259008.2:c.838G>A	0.19		15	66		90	326	44762
Head and Neck Squamous Cell Carcinoma (TCGA, PanCancer Atlas)	TCGA-CN-6011-01	Head and Neck Squamous Cell Carcinoma	S1115F	OncoKB: NA;CIViC: NA;MyCancerGenome: not present;CancerHotspot: no;3DHotspot: no	MutationAssessor: NA;SIFT: impact: deleterious_low_confidence, score: 0.01;Polyphen-2: impact: probably_damaging, score: 0.952	Missense_Mutation	SNP	ShallowDel		.	.	.	17	59761063	59761063	G	A	17:g.59761063G>A	ENST00000259008.2:c.3344C>T	0.72		44	17		77	321	20/20		Uncertain_significance
Head and Neck Squamous Cell Carcinoma (TCGA, PanCancer Atlas)	TCGA-CV-7440-01	Head and Neck Squamous Cell Carcinoma	Q867L	OncoKB: NA;CIViC: NA;MyCancerGenome: not present;CancerHotspot: no;3DHotspot: no	MutationAssessor: NA;SIFT: impact: tolerated, score: 0.26;Polyphen-2: impact: benign, score: 0.106	Missense_Mutation	SNP	Diploid		.	.	.	17	59763502	59763502	T	A	17:g.59763502T>A	ENST00000259008.2:c.2600A>T	0.11		12	95		125	201	19/20
Head and Neck Squamous Cell Carcinoma (TCGA, PanCancer Atlas)	TCGA-CR-7383-01	Head and Neck Squamous Cell Carcinoma	G750V	OncoKB: NA;CIViC: NA;MyCancerGenome: not present;CancerHotspot: no;3DHotspot: no	MutationAssessor: NA;SIFT: impact: deleterious, score: 0.02;Polyphen-2: impact: probably_damaging, score: 1	Missense_Mutation	SNP	Gain		.	.	.	17	59821801	59821801	C	A	17:g.59821801C>A	ENST00000259008.2:c.2249G>T	0.17		47	232		173	105	15/20		Uncertain_significance
Head and Neck Squamous Cell Carcinoma (TCGA, PanCancer Atlas)	TCGA-CV-A6K2-01	Head and Neck Squamous Cell Carcinoma	S1063W	OncoKB: NA;CIViC: NA;MyCancerGenome: not present;CancerHotspot: no;3DHotspot: no	MutationAssessor: NA;SIFT: impact: deleterious_low_confidence, score: 0.01;Polyphen-2: impact: probably_damaging, score: 0.955	Missense_Mutation	SNP	Diploid		.	.	.	17	59761219	59761219	G	C	17:g.59761219G>C	ENST00000259008.2:c.3188C>G	0.12		20	147		174	586	20/20
Kidney Renal Clear Cell Carcinoma (TCGA, PanCancer Atlas)	TCGA-CZ-5465-01	Renal Clear Cell Carcinoma	R762H	OncoKB: NA;CIViC: NA;MyCancerGenome: not present;CancerHotspot: no;3DHotspot: no	MutationAssessor: NA;SIFT: impact: deleterious, score: 0;Polyphen-2: impact: probably_damaging, score: 0.987	Missense_Mutation	SNP	ShallowDel	1	.	.	.	17	59820468	59820468	C	T	17:g.59820468C>T	ENST00000259008.2:c.2285G>A	0.14	0.0024	25	158	1	419	107	16/20		Uncertain_significance
Kidney Renal Clear Cell Carcinoma (TCGA, PanCancer Atlas)	TCGA-B8-4621-01	Renal Clear Cell Carcinoma	T238I	OncoKB: NA;CIViC: NA;MyCancerGenome: not present;CancerHotspot: no;3DHotspot: no	MutationAssessor: NA;SIFT: impact: deleterious, score: 0;Polyphen-2: impact: benign, score: 0.012	Missense_Mutation	SNP	Gain	1	.	.	.	17	59886033	59886033	G	A	17:g.59886033G>A	ENST00000259008.2:c.713C>T	0.44		121	155		230	76	44762		Uncertain_significance
Kidney Renal Clear Cell Carcinoma (TCGA, PanCancer Atlas)	TCGA-CJ-4882-01	Renal Clear Cell Carcinoma	D674Y	OncoKB: NA;CIViC: NA;MyCancerGenome: not present;CancerHotspot: no;3DHotspot: no	MutationAssessor: NA;SIFT: impact: deleterious, score: 0;Polyphen-2: impact: probably_damaging, score: 1	Missense_Mutation	SNP	Diploid	1	.	.	.	17	59853839	59853839	C	A	17:g.59853839C>A	ENST00000259008.2:c.2020G>T	0.11		21	169		225	71	14/20
Kidney Renal Papillary Cell Carcinoma (TCGA, PanCancer Atlas)	TCGA-2Z-A9JI-01	Renal Non-Clear Cell Carcinoma	MAP3K3-BRIP1	OncoKB: NA;CIViC: NA;MyCancerGenome: not present;CancerHotspot: no;3DHotspot: no	MutationAssessor: NA;SIFT: NA;Polyphen-2: NA	fusion	FUSION	Amp				WashU	NA	-1												9
Liver Hepatocellular Carcinoma (TCGA, PanCancer Atlas)	TCGA-UB-A7MB-01	Hepatocellular Carcinoma	X794_splice	OncoKB: NA;CIViC: NA;MyCancerGenome: not present;CancerHotspot: no;3DHotspot: no	MutationAssessor: NA;SIFT: NA;Polyphen-2: NA	Splice_Site	SNP	Diploid		.	.	.	17	59793426	59793426	T	A	17:g.59793426T>A	ENST00000259008.2:c.2380-2A>T	0.42		15	21		50	1320
Liver Hepatocellular Carcinoma (TCGA, PanCancer Atlas)	TCGA-2Y-A9H3-01	Hepatocellular Carcinoma	S913A	OncoKB: NA;CIViC: NA;MyCancerGenome: not present;CancerHotspot: no;3DHotspot: no	MutationAssessor: NA;SIFT: impact: tolerated, score: 0.75;Polyphen-2: impact: benign, score: 0.026	Missense_Mutation	SNP	Diploid	1	.	.	.	17	59763365	59763365	A	C	17:g.59763365A>C	ENST00000259008.2:c.2737T>G	0.18		30	141		143	170	19/20		Uncertain_significance
Liver Hepatocellular Carcinoma (TCGA, PanCancer Atlas)	TCGA-DD-AAD3-01	Hepatocellular Carcinoma	N604S	OncoKB: NA;CIViC: NA;MyCancerGenome: not present;CancerHotspot: no;3DHotspot: no	MutationAssessor: NA;SIFT: impact: tolerated, score: 1;Polyphen-2: impact: benign, score: 0.182	Missense_Mutation	SNP	Diploid		.	.	.	17	59857746	59857746	T	C	17:g.59857746T>C	ENST00000259008.2:c.1811A>G	0.33		80	165		305	67	13/20
Lung Adenocarcinoma (TCGA, PanCancer Atlas)	TCGA-05-4382-01	Non-Small Cell Lung Cancer	X753_splice	OncoKB: NA;CIViC: NA;MyCancerGenome: not present;CancerHotspot: no;3DHotspot: no	MutationAssessor: NA;SIFT: NA;Polyphen-2: NA	Splice_Site	SNP	Gain		.	.	.	17	59820497	59820497	T	A	17:g.59820497T>A	ENST00000259008.2:c.2258-2A>T	0.3		46	108		59	1549
Lung Adenocarcinoma (TCGA, PanCancer Atlas)	TCGA-78-7156-01	Non-Small Cell Lung Cancer	Q561*	OncoKB: NA;CIViC: NA;MyCancerGenome: not present;CancerHotspot: no;3DHotspot: no	MutationAssessor: NA;SIFT: NA;Polyphen-2: NA	Nonsense_Mutation	SNP	Diploid		.	.	.	17	59858314	59858314	G	A	17:g.59858314G>A	ENST00000259008.2:c.1681C>T	0.06		8	135		117	311	44915
Lung Adenocarcinoma (TCGA, PanCancer Atlas)	TCGA-95-7043-01	Non-Small Cell Lung Cancer	E795*	OncoKB: NA;CIViC: NA;MyCancerGenome: not present;CancerHotspot: no;3DHotspot: no	MutationAssessor: NA;SIFT: NA;Polyphen-2: NA	Nonsense_Mutation	SNP	Gain	1	.	.	.	17	59793421	59793421	C	A	17:g.59793421C>A	ENST00000259008.2:c.2383G>T	0.73	0.04	24	9	1	25	1021	17/20
Lung Adenocarcinoma (TCGA, PanCancer Atlas)	TCGA-17-Z051-01	Non-Small Cell Lung Cancer	V457Cfs*6	OncoKB: NA;CIViC: NA;MyCancerGenome: not present;CancerHotspot: no;3DHotspot: no	MutationAssessor: NA;SIFT: NA;Polyphen-2: NA	Frame_Shift_Ins	INS			.	.	.	17	59871062	59871063	-	A	17:g.59871062_59871063insA	ENST00000259008.2:c.1368dup	0.25		12	36		43	167	44854
Lung Adenocarcinoma (TCGA, PanCancer Atlas)	TCGA-05-4390-01	Non-Small Cell Lung Cancer	S1237F	OncoKB: NA;CIViC: NA;MyCancerGenome: not present;CancerHotspot: no;3DHotspot: no	MutationAssessor: NA;SIFT: impact: deleterious_low_confidence, score: 0;Polyphen-2: impact: benign, score: 0.011	Missense_Mutation	SNP	Diploid	1	.	.	.	17	59760697	59760697	G	A	17:g.59760697G>A	ENST00000259008.2:c.3710C>T	0.22		24	86		117	520	20/20		Uncertain_significance
Lung Adenocarcinoma (TCGA, PanCancer Atlas)	TCGA-05-4415-01	Non-Small Cell Lung Cancer	S38I	OncoKB: NA;CIViC: NA;MyCancerGenome: not present;CancerHotspot: no;3DHotspot: no	MutationAssessor: NA;SIFT: impact: tolerated, score: 0.06;Polyphen-2: impact: possibly_damaging, score: 0.465	Missense_Mutation	SNP	Gain	1	.	.	.	17	59937249	59937249	C	A	17:g.59937249C>A	ENST00000259008.2:c.113G>T	0.36		27	48		76	187	44640
Lung Adenocarcinoma (TCGA, PanCancer Atlas)	TCGA-44-2656-01	Non-Small Cell Lung Cancer	I1201V	OncoKB: NA;CIViC: NA;MyCancerGenome: not present;CancerHotspot: no;3DHotspot: no	MutationAssessor: NA;SIFT: impact: tolerated_low_confidence, score: 0.27;Polyphen-2: impact: benign, score: 0.003	Missense_Mutation	SNP	Gain	1	.	.	.	17	59760806	59760806	T	C	17:g.59760806T>C	ENST00000259008.2:c.3601A>G	0.28		13	33		31	766	20/20
Lung Adenocarcinoma (TCGA, PanCancer Atlas)	TCGA-49-AAR4-01	Non-Small Cell Lung Cancer	W708C	OncoKB: NA;CIViC: NA;MyCancerGenome: not present;CancerHotspot: no;3DHotspot: no	MutationAssessor: NA;SIFT: impact: deleterious, score: 0;Polyphen-2: impact: probably_damaging, score: 0.997	Missense_Mutation	SNP	Gain		.	.	.	17	59821926	59821926	C	G	17:g.59821926C>G	ENST00000259008.2:c.2124G>C	0.11		10	77		123	532	15/20
Lung Adenocarcinoma (TCGA, PanCancer Atlas)	TCGA-49-AARO-01	Non-Small Cell Lung Cancer	A89S	OncoKB: NA;CIViC: NA;MyCancerGenome: not present;CancerHotspot: no;3DHotspot: no	MutationAssessor: NA;SIFT: impact: tolerated, score: 0.41;Polyphen-2: impact: benign, score: 0.003	Missense_Mutation	SNP	Gain		.	.	.	17	59934533	59934533	C	A	17:g.59934533C>A	ENST00000259008.2:c.265G>T	0.29		18	45		84	541	44671
Lung Adenocarcinoma (TCGA, PanCancer Atlas)	TCGA-55-7570-01	Non-Small Cell Lung Cancer	F694L	OncoKB: NA;CIViC: NA;MyCancerGenome: not present;CancerHotspot: no;3DHotspot: no	MutationAssessor: NA;SIFT: impact: deleterious, score: 0;Polyphen-2: impact: probably_damaging, score: 0.999	Missense_Mutation	SNP	Diploid	1	.	.	.	17	59853777	59853777	G	C	17:g.59853777G>C	ENST00000259008.2:c.2082C>G	0.25		17	51		59	354	14/20
Lung Adenocarcinoma (TCGA, PanCancer Atlas)	TCGA-55-8507-01	Non-Small Cell Lung Cancer	M331I	OncoKB: NA;CIViC: NA;MyCancerGenome: not present;CancerHotspot: no;3DHotspot: no	MutationAssessor: NA;SIFT: impact: tolerated, score: 0.25;Polyphen-2: impact: benign, score: 0.073	Missense_Mutation	SNP	Gain		.	.	.	17	59878761	59878761	C	A	17:g.59878761C>A	ENST00000259008.2:c.993G>T	0.5		64	63		192	879	44793
Lung Adenocarcinoma (TCGA, PanCancer Atlas)	TCGA-64-1677-01	Non-Small Cell Lung Cancer	I1176L	OncoKB: NA;CIViC: NA;MyCancerGenome: not present;CancerHotspot: no;3DHotspot: no	MutationAssessor: NA;SIFT: impact: tolerated_low_confidence, score: 0.68;Polyphen-2: impact: benign, score: 0	Missense_Mutation	SNP	Gain	1	.	.	.	17	59760881	59760881	T	G	17:g.59760881T>G	ENST00000259008.2:c.3526A>C	0.25		17	50		115	196	20/20
Lung Adenocarcinoma (TCGA, PanCancer Atlas)	TCGA-78-7156-01	Non-Small Cell Lung Cancer	E671Q	OncoKB: NA;CIViC: NA;MyCancerGenome: not present;CancerHotspot: no;3DHotspot: no	MutationAssessor: NA;SIFT: impact: tolerated, score: 0.06;Polyphen-2: impact: possibly_damaging, score: 0.806	Missense_Mutation	SNP	Diploid	2	.	.	.	17	59853848	59853848	C	G	17:g.59853848C>G	ENST00000259008.2:c.2011G>C	0.07		16	205		233	311	14/20
Lung Adenocarcinoma (TCGA, PanCancer Atlas)	TCGA-78-7542-01	Non-Small Cell Lung Cancer	E404K	OncoKB: NA;CIViC: NA;MyCancerGenome: not present;CancerHotspot: no;3DHotspot: no	MutationAssessor: NA;SIFT: impact: deleterious, score: 0;Polyphen-2: impact: probably_damaging, score: 0.999	Missense_Mutation	SNP	Gain	1	.	.	.	17	59876591	59876591	C	T	17:g.59876591C>T	ENST00000259008.2:c.1210G>A	0.39		35	54		79	329	44824
Lung Adenocarcinoma (TCGA, PanCancer Atlas)	TCGA-91-A4BC-01	Non-Small Cell Lung Cancer	R378S	OncoKB: NA;CIViC: NA;MyCancerGenome: not present;CancerHotspot: no;3DHotspot: no	MutationAssessor: NA;SIFT: impact: deleterious, score: 0.01;Polyphen-2: impact: benign, score: 0.329	Missense_Mutation	SNP	Diploid		.	.	.	17	59878620	59878620	C	G	17:g.59878620C>G	ENST00000259008.2:c.1134G>C	0.21		28	104		91	404	44793
Lung Adenocarcinoma (TCGA, PanCancer Atlas)	TCGA-93-8067-01	Non-Small Cell Lung Cancer	D1180H	OncoKB: NA;CIViC: NA;MyCancerGenome: not present;CancerHotspot: no;3DHotspot: no	MutationAssessor: NA;SIFT: impact: deleterious_low_confidence, score: 0.02;Polyphen-2: impact: possibly_damaging, score: 0.847	Missense_Mutation	SNP	Gain		.	.	.	17	59760869	59760869	C	G	17:g.59760869C>G	ENST00000259008.2:c.3538G>C	0.16		12	63		23	453	20/20		Uncertain_significance
Lung Adenocarcinoma (TCGA, PanCancer Atlas)	TCGA-95-A4VN-01	Non-Small Cell Lung Cancer	E1220V	OncoKB: NA;CIViC: NA;MyCancerGenome: not present;CancerHotspot: no;3DHotspot: no	MutationAssessor: NA;SIFT: impact: deleterious_low_confidence, score: 0;Polyphen-2: impact: possibly_damaging, score: 0.474	Missense_Mutation	SNP	Gain		.	.	.	17	59760748	59760748	T	A	17:g.59760748T>A	ENST00000259008.2:c.3659A>T	0.25		22	66		117	424	20/20
Lung Adenocarcinoma (TCGA, PanCancer Atlas)	TCGA-97-8172-01	Non-Small Cell Lung Cancer	W1217G	OncoKB: NA;CIViC: NA;MyCancerGenome: not present;CancerHotspot: no;3DHotspot: no	MutationAssessor: NA;SIFT: impact: tolerated_low_confidence, score: 0.34;Polyphen-2: impact: benign, score: 0.02	Missense_Mutation	SNP	Diploid		.	.	.	17	59760758	59760758	A	C	17:g.59760758A>C	ENST00000259008.2:c.3649T>G	0.06		4	60		36	247	20/20
Lung Squamous Cell Carcinoma (TCGA, PanCancer Atlas)	TCGA-L3-A4E7-01	Non-Small Cell Lung Cancer	T1062Ifs*18	OncoKB: NA;CIViC: NA;MyCancerGenome: not present;CancerHotspot: no;3DHotspot: no	MutationAssessor: NA;SIFT: NA;Polyphen-2: NA	Frame_Shift_Del	DEL	ShallowDel		.	.	.	17	59761221	59761222	TG	-	17:g.59761221_59761222del	ENST00000259008.2:c.3185_3186del	0.26		75	215		250	86	20/20
Lung Squamous Cell Carcinoma (TCGA, PanCancer Atlas)	TCGA-46-3765-01	Non-Small Cell Lung Cancer	T722A	OncoKB: NA;CIViC: NA;MyCancerGenome: not present;CancerHotspot: no;3DHotspot: no	MutationAssessor: NA;SIFT: impact: tolerated, score: 0.1;Polyphen-2: impact: probably_damaging, score: 0.999	Missense_Mutation	SNP	Diploid	1	.	.	.	17	59821886	59821886	T	C	17:g.59821886T>C	ENST00000259008.2:c.2164A>G	0.21		27	101		97	447	15/20
Lung Squamous Cell Carcinoma (TCGA, PanCancer Atlas)	TCGA-L3-A524-01	Non-Small Cell Lung Cancer	G754V	OncoKB: NA;CIViC: NA;MyCancerGenome: not present;CancerHotspot: no;3DHotspot: no	MutationAssessor: NA;SIFT: impact: deleterious, score: 0;Polyphen-2: impact: probably_damaging, score: 0.954	Missense_Mutation	SNP	Gain		.	.	.	17	59820492	59820492	C	A	17:g.59820492C>A	ENST00000259008.2:c.2261G>T	0.17		10	50		72	300	16/20
Mesothelioma (TCGA, PanCancer Atlas)	TCGA-SH-A7BH-01	Pleural Mesothelioma	P272S	OncoKB: NA;CIViC: NA;MyCancerGenome: not present;CancerHotspot: no;3DHotspot: no	MutationAssessor: NA;SIFT: impact: tolerated, score: 0.07;Polyphen-2: impact: probably_damaging, score: 0.92	Missense_Mutation	SNP	ShallowDel		.	.	.	17	59885932	59885932	G	A	17:g.59885932G>A	ENST00000259008.2:c.814C>T	0.82		45	10		121	43	44762
Ovarian Serous Cystadenocarcinoma (TCGA, PanCancer Atlas)	TCGA-13-0889-01	Ovarian Epithelial Tumor	D434Rfs*3	OncoKB: NA;CIViC: NA;MyCancerGenome: not present;CancerHotspot: no;3DHotspot: no	MutationAssessor: NA;SIFT: NA;Polyphen-2: NA	Frame_Shift_Ins	INS	Gain		.	.	.	17	59876501	59876502	-	T	17:g.59876501_59876502insT	ENST00000259008.2:c.1299dup	0.13		11	73		286	1068	44824
Ovarian Serous Cystadenocarcinoma (TCGA, PanCancer Atlas)	TCGA-13-0889-01	Ovarian Epithelial Tumor	L358Tfs*6	OncoKB: NA;CIViC: NA;MyCancerGenome: not present;CancerHotspot: no;3DHotspot: no	MutationAssessor: NA;SIFT: NA;Polyphen-2: NA	Frame_Shift_Ins	INS	Gain		.	.	.	17	59878682	59878683	-	T	17:g.59878682_59878683insT	ENST00000259008.2:c.1071dup	0.09		15	151		420	1068	44793
Ovarian Serous Cystadenocarcinoma (TCGA, PanCancer Atlas)	TCGA-24-2293-01	Ovarian Epithelial Tumor	T650I	OncoKB: NA;CIViC: NA;MyCancerGenome: not present;CancerHotspot: no;3DHotspot: no	MutationAssessor: NA;SIFT: impact: deleterious, score: 0;Polyphen-2: impact: probably_damaging, score: 1	Missense_Mutation	SNP	Gain	1	.	.	.	17	59853910	59853910	G	A	17:g.59853910G>A	ENST00000259008.2:c.1949C>T	0.41		125	178		551	122	14/20
Ovarian Serous Cystadenocarcinoma (TCGA, PanCancer Atlas)	TCGA-29-1783-01	Ovarian Epithelial Tumor	A395T	OncoKB: NA;CIViC: NA;MyCancerGenome: not present;CancerHotspot: no;3DHotspot: no	MutationAssessor: NA;SIFT: impact: deleterious, score: 0;Polyphen-2: impact: probably_damaging, score: 0.999	Missense_Mutation	SNP	ShallowDel	1	.	.	.	17	59876618	59876618	C	T	17:g.59876618C>T	ENST00000259008.2:c.1183G>A	0.17		16	79		143	73	44824
Ovarian Serous Cystadenocarcinoma (TCGA, PanCancer Atlas)	TCGA-23-1114-01	Ovarian Epithelial Tumor	L372P	OncoKB: NA;CIViC: NA;MyCancerGenome: not present;CancerHotspot: no;3DHotspot: no	MutationAssessor: NA;SIFT: impact: deleterious, score: 0;Polyphen-2: impact: probably_damaging, score: 0.994	Missense_Mutation	SNP	Gain		.	.	.	17	59878639	59878639	A	G	17:g.59878639A>G	ENST00000259008.2:c.1115T>C	0.06		25	414		608	134	44793
Ovarian Serous Cystadenocarcinoma (TCGA, PanCancer Atlas)	TCGA-29-1777-01	Ovarian Epithelial Tumor	D361V	OncoKB: NA;CIViC: NA;MyCancerGenome: not present;CancerHotspot: no;3DHotspot: no	MutationAssessor: NA;SIFT: impact: tolerated, score: 0.09;Polyphen-2: impact: possibly_damaging, score: 0.462	Missense_Mutation	SNP	ShallowDel		.	.	.	17	59878672	59878672	T	A	17:g.59878672T>A	ENST00000259008.2:c.1082A>T	0.04		21	557		710	126	44793
Pancreatic Adenocarcinoma (TCGA, PanCancer Atlas)	TCGA-IB-7651-01	Pancreatic Adenocarcinoma	A1167V	OncoKB: NA;CIViC: NA;MyCancerGenome: not present;CancerHotspot: no;3DHotspot: no	MutationAssessor: NA;SIFT: impact: tolerated_low_confidence, score: 0.14;Polyphen-2: impact: benign, score: 0.024	Missense_Mutation	SNP	Diploid		.	.	.	17	59760907	59760907	G	A	17:g.59760907G>A	ENST00000259008.2:c.3500C>T	0.18		44	195		37	14366	20/20
Prostate Adenocarcinoma (TCGA, PanCancer Atlas)	TCGA-VN-A88K-01	Prostate Adenocarcinoma	R581*	OncoKB: NA;CIViC: NA;MyCancerGenome: not present;CancerHotspot: no;3DHotspot: no	MutationAssessor: NA;SIFT: NA;Polyphen-2: NA	Nonsense_Mutation	SNP	Diploid		.	.	.	17	59858254	59858254	G	A	17:g.59858254G>A	ENST00000259008.2:c.1741C>T	0.32		38	80		82	22	44915		Pathogenic/Likely_pathogenic
Prostate Adenocarcinoma (TCGA, PanCancer Atlas)	TCGA-XK-AAIW-01	Prostate Adenocarcinoma	A349V	OncoKB: NA;CIViC: NA;MyCancerGenome: not present;CancerHotspot: no;3DHotspot: no	MutationAssessor: NA;SIFT: impact: deleterious, score: 0.03;Polyphen-2: impact: benign, score: 0.041	Missense_Mutation	SNP	Diploid		.	.	.	17	59878708	59878708	G	A	17:g.59878708G>A	ENST00000259008.2:c.1046C>T	0.45		64	78		96	6251	44793		Uncertain_significance
Prostate Adenocarcinoma (TCGA, PanCancer Atlas)	TCGA-YL-A9WH-01	Prostate Adenocarcinoma	L1158F	OncoKB: NA;CIViC: NA;MyCancerGenome: not present;CancerHotspot: no;3DHotspot: no	MutationAssessor: NA;SIFT: impact: tolerated_low_confidence, score: 0.54;Polyphen-2: impact: benign, score: 0.05	Missense_Mutation	SNP	Amp		.	.	.	17	59760933	59760933	C	A	17:g.59760933C>A	ENST00000259008.2:c.3474G>T	0.25		17	51		40	51	20/20
Sarcoma (TCGA, PanCancer Atlas)	TCGA-WP-A9GB-01	Sarcoma	K1078E	OncoKB: NA;CIViC: NA;MyCancerGenome: not present;CancerHotspot: no;3DHotspot: no	MutationAssessor: NA;SIFT: impact: tolerated_low_confidence, score: 0.19;Polyphen-2: impact: benign, score: 0.059	Missense_Mutation	SNP	Gain		.	.	.	17	59761175	59761175	T	C	17:g.59761175T>C	ENST00000259008.2:c.3232A>G	0.25		12	36		31	136	20/20
Sarcoma (TCGA, PanCancer Atlas)	TCGA-IE-A3OV-01	Sarcoma	PCTP-BRIP1	OncoKB: NA;CIViC: NA;MyCancerGenome: not present;CancerHotspot: no;3DHotspot: no	MutationAssessor: NA;SIFT: NA;Polyphen-2: NA	fusion	FUSION	DeepDel				WashU	NA	-1												32
Skin Cutaneous Melanoma (TCGA, PanCancer Atlas)	TCGA-EE-A3JI-06	Melanoma	K1040Dfs*4	OncoKB: NA;CIViC: NA;MyCancerGenome: not present;CancerHotspot: no;3DHotspot: no	MutationAssessor: NA;SIFT: NA;Polyphen-2: NA	Frame_Shift_Del	DEL	Gain		.	.	.	17	59761289	59761290	TC	-	17:g.59761289_59761290del	ENST00000259008.2:c.3117_3118del	0.16		71	364		370	995	20/20
Skin Cutaneous Melanoma (TCGA, PanCancer Atlas)	TCGA-EE-A2M5-06	Melanoma	A599=	OncoKB: NA;CIViC: NA;MyCancerGenome: not present;CancerHotspot: no;3DHotspot: no	MutationAssessor: NA;SIFT: NA;Polyphen-2: NA	Splice_Region	SNP	ShallowDel		.	.	.	17	59857760	59857760	G	A	17:g.59857760G>A	ENST00000259008.2:c.1797C>T	0.39		49	77		107	1970	13/20
Skin Cutaneous Melanoma (TCGA, PanCancer Atlas)	TCGA-EE-A2MD-06	Melanoma	X831_splice	OncoKB: NA;CIViC: NA;MyCancerGenome: not present;CancerHotspot: no;3DHotspot: no	MutationAssessor: NA;SIFT: NA;Polyphen-2: NA	Splice_Site	SNP	Gain		.	.	.	17	59770874	59770874	C	T	17:g.59770874C>T	ENST00000259008.2:c.2493-1G>A	0.53		89	80		87	2178			Pathogenic/Likely_pathogenic
Skin Cutaneous Melanoma (TCGA, PanCancer Atlas)	TCGA-FW-A3R5-06	Melanoma	Q685*	OncoKB: NA;CIViC: NA;MyCancerGenome: not present;CancerHotspot: no;3DHotspot: no	MutationAssessor: NA;SIFT: NA;Polyphen-2: NA	Nonsense_Mutation	SNP	Diploid	1	.	.	.	17	59853806	59853806	G	A	17:g.59853806G>A	ENST00000259008.2:c.2053C>T	0.32		72	150		136	15834	14/20		Pathogenic/Likely_pathogenic
Skin Cutaneous Melanoma (TCGA, PanCancer Atlas)	TCGA-FW-A3R5-06	Melanoma	P47L	OncoKB: NA;CIViC: NA;MyCancerGenome: not present;CancerHotspot: no;3DHotspot: no	MutationAssessor: NA;SIFT: impact: deleterious, score: 0;Polyphen-2: impact: probably_damaging, score: 1	Missense_Mutation	SNP	Diploid	1	.	.	.	17	59937222	59937222	G	A	17:g.59937222G>A	ENST00000259008.2:c.140C>T	0.15		20	110		76	15834	44640
Skin Cutaneous Melanoma (TCGA, PanCancer Atlas)	TCGA-D3-A8GB-06	Melanoma	W448*	OncoKB: NA;CIViC: NA;MyCancerGenome: not present;CancerHotspot: no;3DHotspot: no	MutationAssessor: NA;SIFT: NA;Polyphen-2: NA	Nonsense_Mutation	SNP	Diploid		.	.	.	17	59871088	59871088	C	T	17:g.59871088C>T	ENST00000259008.2:c.1343G>A	0.12		4	29		36	858	44854		Pathogenic/Likely_pathogenic
Skin Cutaneous Melanoma (TCGA, PanCancer Atlas)	TCGA-D3-A2JP-06	Melanoma	G51*	OncoKB: NA;CIViC: NA;MyCancerGenome: not present;CancerHotspot: no;3DHotspot: no	MutationAssessor: NA;SIFT: NA;Polyphen-2: NA	Nonsense_Mutation	SNP	Diploid		.	.	.	17	59937211	59937211	C	A	17:g.59937211C>A	ENST00000259008.2:c.151G>T	0.09		5	53		47	4150	44640
Skin Cutaneous Melanoma (TCGA, PanCancer Atlas)	TCGA-D3-A8GL-06	Melanoma	X598_splice	OncoKB: NA;CIViC: NA;MyCancerGenome: not present;CancerHotspot: no;3DHotspot: no	MutationAssessor: NA;SIFT: NA;Polyphen-2: NA	Splice_Site	SNP	Diploid		.	.	.	17	59858200	59858200	C	T	17:g.59858200C>T	ENST00000259008.2:c.1794+1G>A	0.4		49	74		142	1526			Likely_pathogenic
Skin Cutaneous Melanoma (TCGA, PanCancer Atlas)	TCGA-EE-A2GO-06	Melanoma	L679F	OncoKB: NA;CIViC: NA;MyCancerGenome: not present;CancerHotspot: no;3DHotspot: no	MutationAssessor: NA;SIFT: impact: deleterious, score: 0;Polyphen-2: impact: probably_damaging, score: 1	Missense_Mutation	SNP	Diploid	1	.	.	.	17	59853824	59853824	G	A	17:g.59853824G>A	ENST00000259008.2:c.2035C>T	0.27		16	44		92	1909	14/20		Uncertain_significance
Skin Cutaneous Melanoma (TCGA, PanCancer Atlas)	TCGA-ER-A3PL-06	Melanoma	S206L	OncoKB: NA;CIViC: NA;MyCancerGenome: not present;CancerHotspot: no;3DHotspot: no	MutationAssessor: NA;SIFT: impact: deleterious, score: 0.02;Polyphen-2: impact: benign, score: 0.017	Missense_Mutation	SNP	Gain	1	.	.	.	17	59924472	59924472	G	A	17:g.59924472G>A	ENST00000259008.2:c.617C>T	0.35		28	52		64	291	44732		Conflicting_interpretations_of_pathogenicity(Likely_benign(1),Uncertain_significance(4))
Skin Cutaneous Melanoma (TCGA, PanCancer Atlas)	TCGA-ER-A19H-06	Melanoma	G190E	OncoKB: NA;CIViC: NA;MyCancerGenome: not present;CancerHotspot: no;3DHotspot: no	MutationAssessor: NA;SIFT: impact: tolerated, score: 0.31;Polyphen-2: impact: benign, score: 0.009	Missense_Mutation	SNP	Diploid	1	.	.	.	17	59924520	59924520	C	T	17:g.59924520C>T	ENST00000259008.2:c.569G>A	0.32		23	49		83	968	44732		Uncertain_significance
Skin Cutaneous Melanoma (TCGA, PanCancer Atlas)	TCGA-EE-A2MJ-06	Melanoma	S956L	OncoKB: NA;CIViC: NA;MyCancerGenome: not present;CancerHotspot: no;3DHotspot: no	MutationAssessor: NA;SIFT: impact: tolerated_low_confidence, score: 0.56;Polyphen-2: impact: benign, score: 0	Missense_Mutation	SNP	Diploid	1	.	.	.	17	59763235	59763235	G	A	17:g.59763235G>A	ENST00000259008.2:c.2867C>T	0.1		13	113		143	1720	19/20		Uncertain_significance
Skin Cutaneous Melanoma (TCGA, PanCancer Atlas)	TCGA-EE-A2MS-06	Melanoma	P1238S	OncoKB: NA;CIViC: NA;MyCancerGenome: not present;CancerHotspot: no;3DHotspot: no	MutationAssessor: NA;SIFT: impact: tolerated_low_confidence, score: 0.19;Polyphen-2: impact: benign, score: 0.01	Missense_Mutation	SNP	Gain	1	.	.	.	17	59760695	59760695	G	A	17:g.59760695G>A	ENST00000259008.2:c.3712C>T	0.41		41	59		75	2464	20/20
Skin Cutaneous Melanoma (TCGA, PanCancer Atlas)	TCGA-DA-A1I0-06	Melanoma	P1246L	OncoKB: NA;CIViC: NA;MyCancerGenome: not present;CancerHotspot: no;3DHotspot: no	MutationAssessor: NA;SIFT: impact: tolerated_low_confidence, score: 0.06;Polyphen-2: impact: benign, score: 0.001	Missense_Mutation	SNP	Diploid	2	.	.	.	17	59760670	59760670	G	A	17:g.59760670G>A	ENST00000259008.2:c.3737C>T	0.24		20	64		64	414	20/20		Conflicting_interpretations_of_pathogenicity(Likely_benign(1),Uncertain_significance(3))
Skin Cutaneous Melanoma (TCGA, PanCancer Atlas)	TCGA-EE-A29D-06	Melanoma	S644L	OncoKB: NA;CIViC: NA;MyCancerGenome: not present;CancerHotspot: no;3DHotspot: no	MutationAssessor: NA;SIFT: impact: deleterious, score: 0;Polyphen-2: impact: probably_damaging, score: 0.999	Missense_Mutation	SNP	Gain	1	.	.	.	17	59857626	59857626	G	A	17:g.59857626G>A	ENST00000259008.2:c.1931C>T	0.46		47	55		120	3096	13/20
Skin Cutaneous Melanoma (TCGA, PanCancer Atlas)	TCGA-ER-A19F-06	Melanoma	P1101L	OncoKB: NA;CIViC: NA;MyCancerGenome: not present;CancerHotspot: no;3DHotspot: no	MutationAssessor: NA;SIFT: impact: tolerated_low_confidence, score: 0.14;Polyphen-2: impact: benign, score: 0.012	Missense_Mutation	SNP	Gain	1	.	.	.	17	59761105	59761105	G	A	17:g.59761105G>A	ENST00000259008.2:c.3302C>T	0.34		54	107		79	1664	20/20
Skin Cutaneous Melanoma (TCGA, PanCancer Atlas)	TCGA-ER-A19T-06	Melanoma	A464G	OncoKB: NA;CIViC: NA;MyCancerGenome: not present;CancerHotspot: no;3DHotspot: no	MutationAssessor: NA;SIFT: impact: tolerated, score: 0.06;Polyphen-2: impact: benign, score: 0.087	Missense_Mutation	SNP	Gain		.	.	.	17	59871040	59871040	G	C	17:g.59871040G>C	ENST00000259008.2:c.1391C>G	0.31		8	18		31	421	44854
Skin Cutaneous Melanoma (TCGA, PanCancer Atlas)	TCGA-FW-A3R5-06	Melanoma	H317Y	OncoKB: NA;CIViC: NA;MyCancerGenome: not present;CancerHotspot: no;3DHotspot: no	MutationAssessor: NA;SIFT: impact: deleterious, score: 0.02;Polyphen-2: impact: benign, score: 0.149	Missense_Mutation	SNP	Diploid	1	.	.	.	17	59878805	59878805	G	A	17:g.59878805G>A	ENST00000259008.2:c.949C>T	0.11		23	178		122	15834	44793
Skin Cutaneous Melanoma (TCGA, PanCancer Atlas)	TCGA-EB-A44P-01	Melanoma	S895F	OncoKB: NA;CIViC: NA;MyCancerGenome: not present;CancerHotspot: no;3DHotspot: no	MutationAssessor: NA;SIFT: impact: deleterious, score: 0.02;Polyphen-2: impact: benign, score: 0.093	Missense_Mutation	SNP		1	.	.	.	17	59763418	59763418	G	A	17:g.59763418G>A	ENST00000259008.2:c.2684C>T	0.48		48	52		246	276	19/20
Skin Cutaneous Melanoma (TCGA, PanCancer Atlas)	TCGA-EE-A182-06	Melanoma	I983S	OncoKB: NA;CIViC: NA;MyCancerGenome: not present;CancerHotspot: no;3DHotspot: no	MutationAssessor: NA;SIFT: impact: tolerated_low_confidence, score: 0.81;Polyphen-2: impact: benign, score: 0.013	Missense_Mutation	SNP	Gain	1	.	.	.	17	59761459	59761459	A	C	17:g.59761459A>C	ENST00000259008.2:c.2948T>G	0.36		14	25		58	1219	20/20
Skin Cutaneous Melanoma (TCGA, PanCancer Atlas)	TCGA-ER-A198-06	Melanoma	G304E	OncoKB: NA;CIViC: NA;MyCancerGenome: not present;CancerHotspot: no;3DHotspot: no	MutationAssessor: NA;SIFT: impact: deleterious, score: 0.03;Polyphen-2: impact: probably_damaging, score: 0.98	Missense_Mutation	SNP	Diploid	1	.	.	.	17	59885835	59885835	C	T	17:g.59885835C>T	ENST00000259008.2:c.911G>A	0.31		20	45		69	420	44762		Uncertain_significance
Skin Cutaneous Melanoma (TCGA, PanCancer Atlas)	TCGA-D3-A3C8-06	Melanoma	C443F	OncoKB: NA;CIViC: NA;MyCancerGenome: not present;CancerHotspot: no;3DHotspot: no	MutationAssessor: NA;SIFT: impact: tolerated, score: 0.62;Polyphen-2: impact: benign, score: 0.019	Missense_Mutation	SNP	Diploid		.	.	.	17	59876473	59876473	C	A	17:g.59876473C>A	ENST00000259008.2:c.1328G>T	0.1		4	38		106	1570	44824
Skin Cutaneous Melanoma (TCGA, PanCancer Atlas)	TCGA-D3-A8GM-06	Melanoma	L1170F	OncoKB: NA;CIViC: NA;MyCancerGenome: not present;CancerHotspot: no;3DHotspot: no	MutationAssessor: NA;SIFT: impact: tolerated_low_confidence, score: 0.15;Polyphen-2: impact: benign, score: 0.041	Missense_Mutation	SNP	Gain		.	.	.	17	59760899	59760899	G	A	17:g.59760899G>A	ENST00000259008.2:c.3508C>T	0.31		27	60		44	3290	20/20
Skin Cutaneous Melanoma (TCGA, PanCancer Atlas)	TCGA-DA-A1IB-06	Melanoma	L974M	OncoKB: NA;CIViC: NA;MyCancerGenome: not present;CancerHotspot: no;3DHotspot: no	MutationAssessor: NA;SIFT: impact: tolerated_low_confidence, score: 0.17;Polyphen-2: impact: benign, score: 0.135	Missense_Mutation	SNP	Diploid		.	.	.	17	59761487	59761487	G	T	17:g.59761487G>T	ENST00000259008.2:c.2920C>A	0.12		6	46		46	2118	20/20
Skin Cutaneous Melanoma (TCGA, PanCancer Atlas)	TCGA-EE-A29X-06	Melanoma	P787Q	OncoKB: NA;CIViC: NA;MyCancerGenome: not present;CancerHotspot: no;3DHotspot: no	MutationAssessor: NA;SIFT: impact: deleterious, score: 0;Polyphen-2: impact: probably_damaging, score: 0.994	Missense_Mutation	SNP	ShallowDel		.	.	.	17	59820393	59820393	G	T	17:g.59820393G>T	ENST00000259008.2:c.2360C>A	0.13		4	28		65	1026	16/20
Skin Cutaneous Melanoma (TCGA, PanCancer Atlas)	TCGA-EE-A2GT-06	Melanoma	Q414K	OncoKB: NA;CIViC: NA;MyCancerGenome: not present;CancerHotspot: no;3DHotspot: no	MutationAssessor: NA;SIFT: impact: deleterious, score: 0.02;Polyphen-2: impact: possibly_damaging, score: 0.603	Missense_Mutation	SNP	ShallowDel		.	.	.	17	59876561	59876561	G	T	17:g.59876561G>T	ENST00000259008.2:c.1240C>A	0.08		3	34		111	1691	44824
Skin Cutaneous Melanoma (TCGA, PanCancer Atlas)	TCGA-EE-A2MG-06	Melanoma	P488H	OncoKB: NA;CIViC: NA;MyCancerGenome: not present;CancerHotspot: no;3DHotspot: no	MutationAssessor: NA;SIFT: impact: deleterious, score: 0;Polyphen-2: impact: probably_damaging, score: 0.978	Missense_Mutation	SNP	ShallowDel		.	.	.	17	59870968	59870968	G	T	17:g.59870968G>T	ENST00000259008.2:c.1463C>A	0.15		5	28		14	950	44854
Skin Cutaneous Melanoma (TCGA, PanCancer Atlas)	TCGA-W3-AA1V-06	Melanoma	F328S	OncoKB: NA;CIViC: NA;MyCancerGenome: not present;CancerHotspot: no;3DHotspot: no	MutationAssessor: NA;SIFT: impact: tolerated, score: 0.31;Polyphen-2: impact: benign, score: 0.124	Missense_Mutation	SNP	ShallowDel		.	.	.	17	59878771	59878771	A	G	17:g.59878771A>G	ENST00000259008.2:c.983T>C	0.36		24	42		105	4565	44793		Uncertain_significance
Stomach Adenocarcinoma (TCGA, PanCancer Atlas)	TCGA-D7-A4YV-01	Esophagogastric Adenocarcinoma	R865W	OncoKB: NA;CIViC: NA;MyCancerGenome: not present;CancerHotspot: no;3DHotspot: no	MutationAssessor: NA;SIFT: impact: deleterious, score: 0;Polyphen-2: impact: probably_damaging, score: 1	Missense_Mutation	SNP	Diploid	2	.	.	.	17	59763509	59763509	G	A	17:g.59763509G>A	ENST00000259008.2:c.2593C>T	0.27		28	75		78	824	19/20		Uncertain_significance
Stomach Adenocarcinoma (TCGA, PanCancer Atlas)	TCGA-CG-5721-01	Esophagogastric Adenocarcinoma	I504Sfs*22	OncoKB: NA;CIViC: NA;MyCancerGenome: not present;CancerHotspot: no;3DHotspot: no	MutationAssessor: NA;SIFT: NA;Polyphen-2: NA	Frame_Shift_Del	DEL	Diploid	1	.	.	.	17	59861749	59861749	T	-	17:g.59861749del	ENST00000259008.2:c.1510del	0.22		96	342		434	3741	44885		Pathogenic
Stomach Adenocarcinoma (TCGA, PanCancer Atlas)	TCGA-BR-8680-01	Esophagogastric Adenocarcinoma	D898N	OncoKB: NA;CIViC: NA;MyCancerGenome: not present;CancerHotspot: no;3DHotspot: no	MutationAssessor: NA;SIFT: impact: tolerated, score: 0.19;Polyphen-2: impact: benign, score: 0.007	Missense_Mutation	SNP	Diploid	1	.	.	.	17	59763410	59763410	C	T	17:g.59763410C>T	ENST00000259008.2:c.2692G>A	0.32		58	125		193	5438	19/20
Stomach Adenocarcinoma (TCGA, PanCancer Atlas)	TCGA-CD-A4MI-01	Esophagogastric Adenocarcinoma	L358P	OncoKB: NA;CIViC: NA;MyCancerGenome: not present;CancerHotspot: no;3DHotspot: no	MutationAssessor: NA;SIFT: impact: deleterious, score: 0;Polyphen-2: impact: probably_damaging, score: 0.991	Missense_Mutation	SNP	Diploid	2	.	.	.	17	59878681	59878681	A	G	17:g.59878681A>G	ENST00000259008.2:c.1073T>C	0.12		26	191		195	922	44793
Stomach Adenocarcinoma (TCGA, PanCancer Atlas)	TCGA-VQ-A8P2-01	Esophagogastric Adenocarcinoma	N1061S	OncoKB: NA;CIViC: NA;MyCancerGenome: not present;CancerHotspot: no;3DHotspot: no	MutationAssessor: NA;SIFT: impact: tolerated_low_confidence, score: 0.18;Polyphen-2: impact: benign, score: 0.007	Missense_Mutation	SNP	Diploid		.	.	.	17	59761225	59761225	T	C	17:g.59761225T>C	ENST00000259008.2:c.3182A>G	0.39		55	86		153	6388	20/20
Stomach Adenocarcinoma (TCGA, PanCancer Atlas)	TCGA-VQ-A8P2-01	Esophagogastric Adenocarcinoma	G290S	OncoKB: NA;CIViC: NA;MyCancerGenome: not present;CancerHotspot: no;3DHotspot: no	MutationAssessor: NA;SIFT: impact: tolerated, score: 0.58;Polyphen-2: impact: probably_damaging, score: 0.956	Missense_Mutation	SNP	Diploid	1	.	.	.	17	59885878	59885878	C	T	17:g.59885878C>T	ENST00000259008.2:c.868G>A	0.29		27	65		86	6388	44762		Uncertain_significance
Stomach Adenocarcinoma (TCGA, PanCancer Atlas)	TCGA-VQ-A8PP-01	Esophagogastric Adenocarcinoma	P115H	OncoKB: NA;CIViC: NA;MyCancerGenome: not present;CancerHotspot: no;3DHotspot: no	MutationAssessor: NA;SIFT: impact: tolerated, score: 0.07;Polyphen-2: impact: probably_damaging, score: 0.914	Missense_Mutation	SNP	Diploid		.	.	.	17	59934454	59934454	G	T	17:g.59934454G>T	ENST00000259008.2:c.344C>A	0.17		23	110		135	1329	44671		Uncertain_significance
Stomach Adenocarcinoma (TCGA, PanCancer Atlas)	TCGA-VQ-A91Z-01	Esophagogastric Adenocarcinoma	S46G	OncoKB: NA;CIViC: NA;MyCancerGenome: not present;CancerHotspot: no;3DHotspot: no	MutationAssessor: NA;SIFT: impact: deleterious, score: 0;Polyphen-2: impact: probably_damaging, score: 0.999	Missense_Mutation	SNP	Gain		.	.	.	17	59937226	59937226	T	C	17:g.59937226T>C	ENST00000259008.2:c.136A>G	0.15		10	57		45	123	44640
Thyroid Carcinoma (TCGA, PanCancer Atlas)	TCGA-DJ-A2QB-01	Well-Differentiated Thyroid Cancer	P210=	OncoKB: NA;CIViC: NA;MyCancerGenome: not present;CancerHotspot: no;3DHotspot: no	MutationAssessor: NA;SIFT: NA;Polyphen-2: NA	Splice_Region	SNP	Diploid		.	.	.	17	59886116	59886116	G	T	17:g.59886116G>T	ENST00000259008.2:c.630C>A	0.1		3	28		46	478	44762
Uterine Corpus Endometrial Carcinoma (TCGA, PanCancer Atlas)	TCGA-AJ-A8CT-01	Endometrial Carcinoma	N576Kfs*2	OncoKB: NA;CIViC: NA;MyCancerGenome: not present;CancerHotspot: no;3DHotspot: no	MutationAssessor: NA;SIFT: NA;Polyphen-2: NA	Frame_Shift_Ins	INS	Diploid		.	.	.	17	59858267	59858268	-	T	17:g.59858267_59858268insT	ENST00000259008.2:c.1727dup	0.25		15	45		45	635	44915		not_provided
Uterine Corpus Endometrial Carcinoma (TCGA, PanCancer Atlas)	TCGA-AP-A051-01	Endometrial Carcinoma	R251H	OncoKB: NA;CIViC: NA;MyCancerGenome: not present;CancerHotspot: no;3DHotspot: no	MutationAssessor: NA;SIFT: impact: deleterious, score: 0;Polyphen-2: impact: probably_damaging, score: 1	Missense_Mutation	SNP	Diploid	1	.	.	.	17	59885994	59885994	C	T	17:g.59885994C>T	ENST00000259008.2:c.752G>A	0.27	0.0046	47	126	1	217	8333	44762		Uncertain_significance
Uterine Corpus Endometrial Carcinoma (TCGA, PanCancer Atlas)	TCGA-B5-A11E-01	Endometrial Carcinoma	E1097*	OncoKB: NA;CIViC: NA;MyCancerGenome: not present;CancerHotspot: no;3DHotspot: no	MutationAssessor: NA;SIFT: NA;Polyphen-2: NA	Nonsense_Mutation	SNP	Diploid	1	.	.	.	17	59761118	59761118	C	A	17:g.59761118C>A	ENST00000259008.2:c.3289G>T	0.44		84	109		389	9083	20/20
Uterine Corpus Endometrial Carcinoma (TCGA, PanCancer Atlas)	TCGA-D1-A17Q-01	Endometrial Carcinoma	R865W	OncoKB: NA;CIViC: NA;MyCancerGenome: not present;CancerHotspot: no;3DHotspot: no	MutationAssessor: NA;SIFT: impact: deleterious, score: 0;Polyphen-2: impact: probably_damaging, score: 1	Missense_Mutation	SNP	Diploid	2	.	.	.	17	59763509	59763509	G	A	17:g.59763509G>A	ENST00000259008.2:c.2593C>T	0.49	0.01	40	42	1	70	5957	19/20		Uncertain_significance
Uterine Corpus Endometrial Carcinoma (TCGA, PanCancer Atlas)	TCGA-EO-A3AV-01	Endometrial Carcinoma	X381_splice	OncoKB: NA;CIViC: NA;MyCancerGenome: not present;CancerHotspot: no;3DHotspot: no	MutationAssessor: NA;SIFT: NA;Polyphen-2: NA	Splice_Site	SNP	Diploid		.	.	.	17	59876661	59876661	C	T	17:g.59876661C>T	ENST00000259008.2:c.1141-1G>A	0.21		5	19		38	4105
Uterine Corpus Endometrial Carcinoma (TCGA, PanCancer Atlas)	TCGA-AP-A0LT-01	Endometrial Carcinoma	I983Lfs*2	OncoKB: NA;CIViC: NA;MyCancerGenome: not present;CancerHotspot: no;3DHotspot: no	MutationAssessor: NA;SIFT: NA;Polyphen-2: NA	Frame_Shift_Del	DEL	Diploid		.	.	.	17	59761460	59761460	T	-	17:g.59761460del	ENST00000259008.2:c.2947del	0.29		48	118		137	639	20/20		Pathogenic/Likely_pathogenic
Uterine Corpus Endometrial Carcinoma (TCGA, PanCancer Atlas)	TCGA-AX-A2HG-01	Endometrial Carcinoma	I983Lfs*2	OncoKB: NA;CIViC: NA;MyCancerGenome: not present;CancerHotspot: no;3DHotspot: no	MutationAssessor: NA;SIFT: NA;Polyphen-2: NA	Frame_Shift_Del	DEL	Diploid		.	.	.	17	59761460	59761460	T	-	17:g.59761460del	ENST00000259008.2:c.2947del	0.31		14	31		22	865	20/20		Pathogenic/Likely_pathogenic
Uterine Corpus Endometrial Carcinoma (TCGA, PanCancer Atlas)	TCGA-AX-A1C9-01	Endometrial Carcinoma	R798*	OncoKB: NA;CIViC: NA;MyCancerGenome: not present;CancerHotspot: no;3DHotspot: no	MutationAssessor: NA;SIFT: NA;Polyphen-2: NA	Nonsense_Mutation	SNP	Diploid		.	.	.	17	59793412	59793412	G	A	17:g.59793412G>A	ENST00000259008.2:c.2392C>T	0.43		41	55		101	968	17/20		Conflicting_interpretations_of_pathogenicity(Likely_pathogenic(2),Pathogenic(17),Uncertain_significance(1))
Uterine Corpus Endometrial Carcinoma (TCGA, PanCancer Atlas)	TCGA-AP-A0LM-01	Endometrial Carcinoma	R251C	OncoKB: NA;CIViC: NA;MyCancerGenome: not present;CancerHotspot: no;3DHotspot: no	MutationAssessor: NA;SIFT: impact: deleterious, score: 0;Polyphen-2: impact: probably_damaging, score: 1	Missense_Mutation	SNP	Diploid	1	.	.	.	17	59885995	59885995	G	A	17:g.59885995G>A	ENST00000259008.2:c.751C>T	0.09		3	30		230	13260	44762		Conflicting_interpretations_of_pathogenicity(Likely_pathogenic(3),Pathogenic(1),Uncertain_significance(1))
Uterine Corpus Endometrial Carcinoma (TCGA, PanCancer Atlas)	TCGA-A5-A0G2-01	Endometrial Carcinoma	G49*	OncoKB: NA;CIViC: NA;MyCancerGenome: not present;CancerHotspot: no;3DHotspot: no	MutationAssessor: NA;SIFT: NA;Polyphen-2: NA	Nonsense_Mutation	SNP	Diploid		.	.	.	17	59937217	59937217	C	A	17:g.59937217C>A	ENST00000259008.2:c.145G>T	0.48		72	79		193	25820	44640
Uterine Corpus Endometrial Carcinoma (TCGA, PanCancer Atlas)	TCGA-A5-A2K5-01	Endometrial Carcinoma	E1128*	OncoKB: NA;CIViC: NA;MyCancerGenome: not present;CancerHotspot: no;3DHotspot: no	MutationAssessor: NA;SIFT: NA;Polyphen-2: NA	Nonsense_Mutation	SNP	Diploid		.	.	.	17	59761025	59761025	C	A	17:g.59761025C>A	ENST00000259008.2:c.3382G>T	0.4		14	21		52	8539	20/20
Uterine Corpus Endometrial Carcinoma (TCGA, PanCancer Atlas)	TCGA-D1-A17Q-01	Endometrial Carcinoma	X31_splice	OncoKB: NA;CIViC: NA;MyCancerGenome: not present;CancerHotspot: no;3DHotspot: no	MutationAssessor: NA;SIFT: NA;Polyphen-2: NA	Splice_Site	SNP	Diploid		.	.	.	17	59938806	59938806	A	G	17:g.59938806A>G	ENST00000259008.2:c.93+2T>C	0.07		18	225		202	5957			Likely_pathogenic
Uterine Corpus Endometrial Carcinoma (TCGA, PanCancer Atlas)	TCGA-DF-A2KU-01	Endometrial Carcinoma	G224*	OncoKB: NA;CIViC: NA;MyCancerGenome: not present;CancerHotspot: no;3DHotspot: no	MutationAssessor: NA;SIFT: NA;Polyphen-2: NA	Nonsense_Mutation	SNP	Diploid		.	.	.	17	59886076	59886076	C	A	17:g.59886076C>A	ENST00000259008.2:c.670G>T	0.26		16	45		28	10098	44762
Uterine Corpus Endometrial Carcinoma (TCGA, PanCancer Atlas)	TCGA-E6-A2P8-01	Endometrial Carcinoma	X793_splice	OncoKB: NA;CIViC: NA;MyCancerGenome: not present;CancerHotspot: no;3DHotspot: no	MutationAssessor: NA;SIFT: NA;Polyphen-2: NA	Splice_Site	SNP	Diploid		.	.	.	17	59820372	59820372	A	G	17:g.59820372A>G	ENST00000259008.2:c.2379+2T>C	0.12		5	36		33	564
Uterine Corpus Endometrial Carcinoma (TCGA, PanCancer Atlas)	TCGA-E6-A2P9-01	Endometrial Carcinoma	Q25*	OncoKB: NA;CIViC: NA;MyCancerGenome: not present;CancerHotspot: no;3DHotspot: no	MutationAssessor: NA;SIFT: NA;Polyphen-2: NA	Nonsense_Mutation	SNP	Diploid		.	.	.	17	59938828	59938828	G	A	17:g.59938828G>A	ENST00000259008.2:c.73C>T	0.38		9	15		23	868	44612		Pathogenic
Uterine Corpus Endometrial Carcinoma (TCGA, PanCancer Atlas)	TCGA-A5-A2K5-01	Endometrial Carcinoma	R798Q	OncoKB: NA;CIViC: NA;MyCancerGenome: not present;CancerHotspot: no;3DHotspot: no	MutationAssessor: NA;SIFT: impact: tolerated, score: 0.06;Polyphen-2: impact: possibly_damaging, score: 0.896	Missense_Mutation	SNP	Diploid	1	.	.	.	17	59793411	59793411	C	T	17:g.59793411C>T	ENST00000259008.2:c.2393G>A	0.34		17	33		53	8539	17/20		Uncertain_significance
Uterine Corpus Endometrial Carcinoma (TCGA, PanCancer Atlas)	TCGA-AP-A056-01	Endometrial Carcinoma	D1120A	OncoKB: NA;CIViC: NA;MyCancerGenome: not present;CancerHotspot: no;3DHotspot: no	MutationAssessor: NA;SIFT: impact: tolerated_low_confidence, score: 1;Polyphen-2: impact: benign, score: 0	Missense_Mutation	SNP	Diploid	1	.	.	.	17	59761048	59761048	T	G	17:g.59761048T>G	ENST00000259008.2:c.3359A>C	0.34		63	123		199	8256	20/20
Uterine Corpus Endometrial Carcinoma (TCGA, PanCancer Atlas)	TCGA-AP-A059-01	Endometrial Carcinoma	F108S	OncoKB: NA;CIViC: NA;MyCancerGenome: not present;CancerHotspot: no;3DHotspot: no	MutationAssessor: NA;SIFT: impact: tolerated, score: 0.15;Polyphen-2: impact: probably_damaging, score: 0.98	Missense_Mutation	SNP	Diploid	1	.	.	.	17	59934475	59934475	A	G	17:g.59934475A>G	ENST00000259008.2:c.323T>C	0.15		59	340		677	10968	44671
Uterine Corpus Endometrial Carcinoma (TCGA, PanCancer Atlas)	TCGA-AP-A0LM-01	Endometrial Carcinoma	K1086N	OncoKB: NA;CIViC: NA;MyCancerGenome: not present;CancerHotspot: no;3DHotspot: no	MutationAssessor: NA;SIFT: impact: tolerated_low_confidence, score: 0.23;Polyphen-2: impact: benign, score: 0.005	Missense_Mutation	SNP	Diploid	1	.	.	.	17	59761149	59761149	T	G	17:g.59761149T>G	ENST00000259008.2:c.3258A>C	0.28		41	105		471	13260	20/20
Uterine Corpus Endometrial Carcinoma (TCGA, PanCancer Atlas)	TCGA-AP-A1DH-01	Endometrial Carcinoma	S123L	OncoKB: NA;CIViC: NA;MyCancerGenome: not present;CancerHotspot: no;3DHotspot: no	MutationAssessor: NA;SIFT: impact: tolerated, score: 0.44;Polyphen-2: impact: benign, score: 0.01	Missense_Mutation	SNP	Diploid		.	.	.	17	59934430	59934430	G	A	17:g.59934430G>A	ENST00000259008.2:c.368C>T	0.25		13	40		99	583	44671
Uterine Corpus Endometrial Carcinoma (TCGA, PanCancer Atlas)	TCGA-AP-A1DV-01	Endometrial Carcinoma	A551V	OncoKB: NA;CIViC: NA;MyCancerGenome: not present;CancerHotspot: no;3DHotspot: no	MutationAssessor: NA;SIFT: impact: tolerated, score: 0.11;Polyphen-2: impact: probably_damaging, score: 0.999	Missense_Mutation	SNP	Diploid	3	.	.	.	17	59858343	59858343	G	A	17:g.59858343G>A	ENST00000259008.2:c.1652C>T	0.5		10	10		19	12101	44915		Uncertain_significance
Uterine Corpus Endometrial Carcinoma (TCGA, PanCancer Atlas)	TCGA-BG-A0M9-01	Endometrial Carcinoma	A551V	OncoKB: NA;CIViC: NA;MyCancerGenome: not present;CancerHotspot: no;3DHotspot: no	MutationAssessor: NA;SIFT: impact: tolerated, score: 0.11;Polyphen-2: impact: probably_damaging, score: 0.999	Missense_Mutation	SNP	Diploid	3	.	.	.	17	59858343	59858343	G	A	17:g.59858343G>A	ENST00000259008.2:c.1652C>T	0.44		134	172		155	58	44915		Uncertain_significance
Uterine Corpus Endometrial Carcinoma (TCGA, PanCancer Atlas)	TCGA-D1-A103-01	Endometrial Carcinoma	A551V	OncoKB: NA;CIViC: NA;MyCancerGenome: not present;CancerHotspot: no;3DHotspot: no	MutationAssessor: NA;SIFT: impact: tolerated, score: 0.11;Polyphen-2: impact: probably_damaging, score: 0.999	Missense_Mutation	SNP	Diploid	3	.	.	.	17	59858343	59858343	G	A	17:g.59858343G>A	ENST00000259008.2:c.1652C>T	0.38		37	60		125	6876	44915		Uncertain_significance
Uterine Corpus Endometrial Carcinoma (TCGA, PanCancer Atlas)	TCGA-AX-A05S-01	Endometrial Carcinoma	G1024R	OncoKB: NA;CIViC: NA;MyCancerGenome: not present;CancerHotspot: no;3DHotspot: no	MutationAssessor: NA;SIFT: impact: tolerated_low_confidence, score: 0.69;Polyphen-2: impact: benign, score: 0	Missense_Mutation	SNP	Diploid	2	.	.	.	17	59761337	59761337	C	T	17:g.59761337C>T	ENST00000259008.2:c.3070G>A	0.31		69	152		259	495	20/20		Conflicting_interpretations_of_pathogenicity(Likely_benign(1),Uncertain_significance(3))
Uterine Corpus Endometrial Carcinoma (TCGA, PanCancer Atlas)	TCGA-AX-A064-01	Endometrial Carcinoma	C88del	OncoKB: NA;CIViC: NA;MyCancerGenome: not present;CancerHotspot: no;3DHotspot: no	MutationAssessor: NA;SIFT: NA;Polyphen-2: NA	In_Frame_Del	DEL	Diploid	1	.	.	.	17	59934534	59934536	ACA	-	17:g.59934534_59934536del	ENST00000259008.2:c.262_264del	0.37		119	201		286	262	44671
Uterine Corpus Endometrial Carcinoma (TCGA, PanCancer Atlas)	TCGA-AX-A0J1-01	Endometrial Carcinoma	A745T	OncoKB: NA;CIViC: NA;MyCancerGenome: not present;CancerHotspot: no;3DHotspot: no	MutationAssessor: NA;SIFT: impact: deleterious, score: 0.02;Polyphen-2: impact: probably_damaging, score: 0.956	Missense_Mutation	SNP	Diploid	4	.	.	.	17	59821817	59821817	C	T	17:g.59821817C>T	ENST00000259008.2:c.2233G>A	0.32		146	305		450	5138	15/20		Uncertain_significance
Uterine Corpus Endometrial Carcinoma (TCGA, PanCancer Atlas)	TCGA-AX-A2HC-01	Endometrial Carcinoma	S230L	OncoKB: NA;CIViC: NA;MyCancerGenome: not present;CancerHotspot: no;3DHotspot: no	MutationAssessor: NA;SIFT: impact: tolerated, score: 0.09;Polyphen-2: impact: benign, score: 0.015	Missense_Mutation	SNP	Diploid		.	.	.	17	59886057	59886057	G	A	17:g.59886057G>A	ENST00000259008.2:c.689C>T	0.51		20	19		55	13028	44762		Conflicting_interpretations_of_pathogenicity(Likely_benign(4),Uncertain_significance(6))
Uterine Corpus Endometrial Carcinoma (TCGA, PanCancer Atlas)	TCGA-FI-A2D5-01	Endometrial Carcinoma	S230L	OncoKB: NA;CIViC: NA;MyCancerGenome: not present;CancerHotspot: no;3DHotspot: no	MutationAssessor: NA;SIFT: impact: tolerated, score: 0.09;Polyphen-2: impact: benign, score: 0.015	Missense_Mutation	SNP	Diploid		.	.	.	17	59886057	59886057	G	A	17:g.59886057G>A	ENST00000259008.2:c.689C>T	0.14		8	48		58	13948	44762		Conflicting_interpretations_of_pathogenicity(Likely_benign(4),Uncertain_significance(6))
Uterine Corpus Endometrial Carcinoma (TCGA, PanCancer Atlas)	TCGA-B5-A0JV-01	Endometrial Carcinoma	S320T	OncoKB: NA;CIViC: NA;MyCancerGenome: not present;CancerHotspot: no;3DHotspot: no	MutationAssessor: NA;SIFT: impact: tolerated, score: 0.14;Polyphen-2: impact: possibly_damaging, score: 0.543	Missense_Mutation	SNP	Diploid	1	.	.	.	17	59878795	59878795	C	G	17:g.59878795C>G	ENST00000259008.2:c.959G>C	0.47		167	189		582	346	44793
Uterine Corpus Endometrial Carcinoma (TCGA, PanCancer Atlas)	TCGA-B5-A0JY-01	Endometrial Carcinoma	P1246T	OncoKB: NA;CIViC: NA;MyCancerGenome: not present;CancerHotspot: no;3DHotspot: no	MutationAssessor: NA;SIFT: impact: tolerated_low_confidence, score: 0.12;Polyphen-2: impact: benign, score: 0.001	Missense_Mutation	SNP	Diploid	2	.	.	.	17	59760671	59760671	G	T	17:g.59760671G>T	ENST00000259008.2:c.3736C>A	0.3		20	46		68	9746	20/20
Uterine Corpus Endometrial Carcinoma (TCGA, PanCancer Atlas)	TCGA-BG-A0VZ-01	Endometrial Carcinoma	A745V	OncoKB: NA;CIViC: NA;MyCancerGenome: not present;CancerHotspot: no;3DHotspot: no	MutationAssessor: NA;SIFT: impact: tolerated, score: 0.06;Polyphen-2: impact: probably_damaging, score: 0.975	Missense_Mutation	SNP	Diploid	4	.	.	.	17	59821816	59821816	G	A	17:g.59821816G>A	ENST00000259008.2:c.2234C>T	0.3		85	197		290	332	15/20
Uterine Corpus Endometrial Carcinoma (TCGA, PanCancer Atlas)	TCGA-BS-A0UF-01	Endometrial Carcinoma	I507M	OncoKB: NA;CIViC: NA;MyCancerGenome: not present;CancerHotspot: no;3DHotspot: no	MutationAssessor: NA;SIFT: impact: tolerated, score: 0.19;Polyphen-2: impact: benign, score: 0.087	Missense_Mutation	SNP	Diploid	1	.	.	.	17	59861738	59861738	A	C	17:g.59861738A>C	ENST00000259008.2:c.1521T>G	0.27		56	149		192	8410	44885
Uterine Corpus Endometrial Carcinoma (TCGA, PanCancer Atlas)	TCGA-BS-A0UF-01	Endometrial Carcinoma	T132N	OncoKB: NA;CIViC: NA;MyCancerGenome: not present;CancerHotspot: no;3DHotspot: no	MutationAssessor: NA;SIFT: impact: tolerated, score: 0.65;Polyphen-2: impact: benign, score: 0.001	Missense_Mutation	SNP	Diploid	1	.	.	.	17	59926602	59926602	G	T	17:g.59926602G>T	ENST00000259008.2:c.395C>A	0.3		30	69		213	8410	44701
Uterine Corpus Endometrial Carcinoma (TCGA, PanCancer Atlas)	TCGA-BS-A0UJ-01	Endometrial Carcinoma	S601P	OncoKB: NA;CIViC: NA;MyCancerGenome: not present;CancerHotspot: no;3DHotspot: no	MutationAssessor: NA;SIFT: impact: deleterious, score: 0;Polyphen-2: impact: probably_damaging, score: 0.986	Missense_Mutation	SNP	Diploid	1	.	.	.	17	59857756	59857756	A	G	17:g.59857756A>G	ENST00000259008.2:c.1801T>C	0.32		15	32		64	1586	13/20
Uterine Corpus Endometrial Carcinoma (TCGA, PanCancer Atlas)	TCGA-D1-A103-01	Endometrial Carcinoma	M620I	OncoKB: NA;CIViC: NA;MyCancerGenome: not present;CancerHotspot: no;3DHotspot: no	MutationAssessor: NA;SIFT: impact: deleterious, score: 0.05;Polyphen-2: impact: possibly_damaging, score: 0.702	Missense_Mutation	SNP	Diploid	3	.	.	.	17	59857697	59857697	C	A	17:g.59857697C>A	ENST00000259008.2:c.1860G>T	0.36		16	29		94	6876	13/20
Uterine Corpus Endometrial Carcinoma (TCGA, PanCancer Atlas)	TCGA-D1-A16N-01	Endometrial Carcinoma	V779I	OncoKB: NA;CIViC: NA;MyCancerGenome: not present;CancerHotspot: no;3DHotspot: no	MutationAssessor: NA;SIFT: impact: deleterious, score: 0;Polyphen-2: impact: probably_damaging, score: 0.954	Missense_Mutation	SNP	ShallowDel	1	.	.	.	17	59820418	59820418	C	T	17:g.59820418C>T	ENST00000259008.2:c.2335G>A	0.1		15	135		232	129	16/20		Uncertain_significance
Uterine Corpus Endometrial Carcinoma (TCGA, PanCancer Atlas)	TCGA-D1-A16X-01	Endometrial Carcinoma	K1205R	OncoKB: NA;CIViC: NA;MyCancerGenome: not present;CancerHotspot: no;3DHotspot: no	MutationAssessor: NA;SIFT: impact: tolerated_low_confidence, score: 0.12;Polyphen-2: impact: possibly_damaging, score: 0.628	Missense_Mutation	SNP	Diploid	1	.	.	.	17	59760793	59760793	T	C	17:g.59760793T>C	ENST00000259008.2:c.3614A>G	0.22	0.0057	41	149	1	173	2738	20/20
Uterine Corpus Endometrial Carcinoma (TCGA, PanCancer Atlas)	TCGA-E6-A1M0-01	Endometrial Carcinoma	R416W	OncoKB: NA;CIViC: NA;MyCancerGenome: not present;CancerHotspot: no;3DHotspot: no	MutationAssessor: NA;SIFT: impact: tolerated, score: 0.13;Polyphen-2: impact: benign, score: 0.048	Missense_Mutation	SNP	Diploid		.	.	.	17	59876555	59876555	G	A	17:g.59876555G>A	ENST00000259008.2:c.1246C>T	0.39		14	22		51	1743	44824		Uncertain_significance
Uterine Corpus Endometrial Carcinoma (TCGA, PanCancer Atlas)	TCGA-EO-A22R-01	Endometrial Carcinoma	R1035C	OncoKB: NA;CIViC: NA;MyCancerGenome: not present;CancerHotspot: no;3DHotspot: no	MutationAssessor: NA;SIFT: impact: deleterious_low_confidence, score: 0.02;Polyphen-2: impact: benign, score: 0.282	Missense_Mutation	SNP	Diploid		.	.	.	17	59761304	59761304	G	A	17:g.59761304G>A	ENST00000259008.2:c.3103C>T	0.33		12	24		39	12838	20/20		Conflicting_interpretations_of_pathogenicity(Benign(1),Likely_benign(2),Uncertain_significance(6))
Uterine Corpus Endometrial Carcinoma (TCGA, PanCancer Atlas)	TCGA-EO-A22R-01	Endometrial Carcinoma	R264W	OncoKB: NA;CIViC: NA;MyCancerGenome: not present;CancerHotspot: no;3DHotspot: no	MutationAssessor: NA;SIFT: impact: deleterious, score: 0;Polyphen-2: impact: probably_damaging, score: 0.992	Missense_Mutation	SNP	Diploid		.	.	.	17	59885956	59885956	G	A	17:g.59885956G>A	ENST00000259008.2:c.790C>T	0.38		16	26		39	12838	44762		Conflicting_interpretations_of_pathogenicity(Benign(1),Likely_benign(12),Uncertain_significance(1))
Uterine Corpus Endometrial Carcinoma (TCGA, PanCancer Atlas)	TCGA-AX-A1CE-01	Endometrial Carcinoma	R814C	OncoKB: NA;CIViC: NA;MyCancerGenome: not present;CancerHotspot: no;3DHotspot: no	MutationAssessor: NA;SIFT: impact: deleterious, score: 0.02;Polyphen-2: impact: probably_damaging, score: 1	Missense_Mutation	SNP	Diploid		.	.	.	17	59793364	59793364	G	A	17:g.59793364G>A	ENST00000259008.2:c.2440C>T	0.35		37	69		100	11479	17/20		Conflicting_interpretations_of_pathogenicity(Benign(1),Likely_benign(4),Uncertain_significance(5))
Uterine Corpus Endometrial Carcinoma (TCGA, PanCancer Atlas)	TCGA-B5-A1MR-01	Endometrial Carcinoma	L892I	OncoKB: NA;CIViC: NA;MyCancerGenome: not present;CancerHotspot: no;3DHotspot: no	MutationAssessor: NA;SIFT: impact: tolerated, score: 1;Polyphen-2: impact: benign, score: 0	Missense_Mutation	SNP	Diploid		.	.	.	17	59763428	59763428	G	T	17:g.59763428G>T	ENST00000259008.2:c.2674C>A	0.17		4	20		24	7326	19/20
Uterine Corpus Endometrial Carcinoma (TCGA, PanCancer Atlas)	TCGA-D1-A16X-01	Endometrial Carcinoma	K1113E	OncoKB: NA;CIViC: NA;MyCancerGenome: not present;CancerHotspot: no;3DHotspot: no	MutationAssessor: NA;SIFT: impact: tolerated_low_confidence, score: 0.87;Polyphen-2: impact: benign, score: 0.003	Missense_Mutation	SNP	Diploid		.	.	.	17	59761070	59761070	T	C	17:g.59761070T>C	ENST00000259008.2:c.3337A>G	0.06		10	167		193	2738	20/20		Uncertain_significance
Uterine Corpus Endometrial Carcinoma (TCGA, PanCancer Atlas)	TCGA-E6-A1LX-01	Endometrial Carcinoma	S1055F	OncoKB: NA;CIViC: NA;MyCancerGenome: not present;CancerHotspot: no;3DHotspot: no	MutationAssessor: NA;SIFT: impact: deleterious_low_confidence, score: 0.05;Polyphen-2: impact: benign, score: 0.059	Missense_Mutation	SNP	Diploid		.	.	.	17	59761243	59761243	G	A	17:g.59761243G>A	ENST00000259008.2:c.3164C>T	0.17		10	49		41	12757	20/20
Uterine Corpus Endometrial Carcinoma (TCGA, PanCancer Atlas)	TCGA-E6-A1LX-01	Endometrial Carcinoma	S861F	OncoKB: NA;CIViC: NA;MyCancerGenome: not present;CancerHotspot: no;3DHotspot: no	MutationAssessor: NA;SIFT: impact: deleterious, score: 0;Polyphen-2: impact: probably_damaging, score: 0.985	Missense_Mutation	SNP	Diploid		.	.	.	17	59763520	59763520	G	A	17:g.59763520G>A	ENST00000259008.2:c.2582C>T	0.16		6	31		34	12757	19/20
Uterine Corpus Endometrial Carcinoma (TCGA, PanCancer Atlas)	TCGA-EO-A3AV-01	Endometrial Carcinoma	R160I	OncoKB: NA;CIViC: NA;MyCancerGenome: not present;CancerHotspot: no;3DHotspot: no	MutationAssessor: NA;SIFT: impact: deleterious, score: 0;Polyphen-2: impact: possibly_damaging, score: 0.891	Missense_Mutation	SNP	Diploid	2	.	.	.	17	59926518	59926518	C	A	17:g.59926518C>A	ENST00000259008.2:c.479G>T	0.34		20	39		77	4105	44701		Uncertain_significance
Uterine Corpus Endometrial Carcinoma (TCGA, PanCancer Atlas)	TCGA-EO-A3AV-01	Endometrial Carcinoma	S1063L	OncoKB: NA;CIViC: NA;MyCancerGenome: not present;CancerHotspot: no;3DHotspot: no	MutationAssessor: NA;SIFT: impact: tolerated_low_confidence, score: 0.23;Polyphen-2: impact: benign, score: 0.031	Missense_Mutation	SNP	Diploid		.	.	.	17	59761219	59761219	G	A	17:g.59761219G>A	ENST00000259008.2:c.3188C>T	0.24		12	38		53	4105	20/20		Uncertain_significance
Uterine Corpus Endometrial Carcinoma (TCGA, PanCancer Atlas)	TCGA-A5-A2K5-01	Endometrial Carcinoma	K642N	OncoKB: NA;CIViC: NA;MyCancerGenome: not present;CancerHotspot: no;3DHotspot: no	MutationAssessor: NA;SIFT: impact: tolerated, score: 1;Polyphen-2: impact: benign, score: 0	Missense_Mutation	SNP	Diploid		.	.	.	17	59857631	59857631	T	A	17:g.59857631T>A	ENST00000259008.2:c.1926A>T	0.45		17	21		50	8539	13/20
Uterine Corpus Endometrial Carcinoma (TCGA, PanCancer Atlas)	TCGA-AP-A1DV-01	Endometrial Carcinoma	N826S	OncoKB: NA;CIViC: NA;MyCancerGenome: not present;CancerHotspot: no;3DHotspot: no	MutationAssessor: NA;SIFT: impact: deleterious, score: 0;Polyphen-2: impact: probably_damaging, score: 0.999	Missense_Mutation	SNP	Diploid		.	.	.	17	59793327	59793327	T	C	17:g.59793327T>C	ENST00000259008.2:c.2477A>G	0.34		23	44		35	12101	17/20		Uncertain_significance
Uterine Corpus Endometrial Carcinoma (TCGA, PanCancer Atlas)	TCGA-AX-A06F-01	Endometrial Carcinoma	A585V	OncoKB: NA;CIViC: NA;MyCancerGenome: not present;CancerHotspot: no;3DHotspot: no	MutationAssessor: NA;SIFT: impact: tolerated, score: 0.68;Polyphen-2: impact: benign, score: 0.315	Missense_Mutation	SNP	Diploid		.	.	.	17	59858241	59858241	G	A	17:g.59858241G>A	ENST00000259008.2:c.1754C>T	0.38		114	183		172	7303	44915
Uterine Corpus Endometrial Carcinoma (TCGA, PanCancer Atlas)	TCGA-AX-A2HD-01	Endometrial Carcinoma	L527F	OncoKB: NA;CIViC: NA;MyCancerGenome: not present;CancerHotspot: no;3DHotspot: no	MutationAssessor: NA;SIFT: impact: deleterious, score: 0.03;Polyphen-2: impact: probably_damaging, score: 0.966	Missense_Mutation	SNP	Diploid		.	.	.	17	59861680	59861680	G	A	17:g.59861680G>A	ENST00000259008.2:c.1579C>T	0.47		41	47		63	7893	44885
Uterine Corpus Endometrial Carcinoma (TCGA, PanCancer Atlas)	TCGA-B5-A1MR-01	Endometrial Carcinoma	D535Y	OncoKB: NA;CIViC: NA;MyCancerGenome: not present;CancerHotspot: no;3DHotspot: no	MutationAssessor: NA;SIFT: impact: deleterious, score: 0.04;Polyphen-2: impact: probably_damaging, score: 0.979	Missense_Mutation	SNP	Diploid		.	.	.	17	59861656	59861656	C	A	17:g.59861656C>A	ENST00000259008.2:c.1603G>T	0.11		5	40		27	7326	44885
Uterine Corpus Endometrial Carcinoma (TCGA, PanCancer Atlas)	TCGA-B5-A1MR-01	Endometrial Carcinoma	K242N	OncoKB: NA;CIViC: NA;MyCancerGenome: not present;CancerHotspot: no;3DHotspot: no	MutationAssessor: NA;SIFT: impact: tolerated, score: 0.32;Polyphen-2: impact: probably_damaging, score: 0.945	Missense_Mutation	SNP	Diploid		.	.	.	17	59886020	59886020	C	A	17:g.59886020C>A	ENST00000259008.2:c.726G>T	0.15		7	39		38	7326	44762
Uterine Corpus Endometrial Carcinoma (TCGA, PanCancer Atlas)	TCGA-BK-A6W3-01	Endometrial Carcinoma	N659T	OncoKB: NA;CIViC: NA;MyCancerGenome: not present;CancerHotspot: no;3DHotspot: no	MutationAssessor: NA;SIFT: impact: tolerated, score: 0.14;Polyphen-2: impact: possibly_damaging, score: 0.69	Missense_Mutation	SNP	Diploid		.	.	.	17	59853883	59853883	T	G	17:g.59853883T>G	ENST00000259008.2:c.1976A>C	0.44		28	36		46	3946	14/20
Uterine Corpus Endometrial Carcinoma (TCGA, PanCancer Atlas)	TCGA-DF-A2L0-01	Endometrial Carcinoma	S189L	OncoKB: NA;CIViC: NA;MyCancerGenome: not present;CancerHotspot: no;3DHotspot: no	MutationAssessor: NA;SIFT: impact: tolerated, score: 0.14;Polyphen-2: impact: benign, score: 0.011	Missense_Mutation	SNP	ShallowDel		.	.	.	17	59924523	59924523	G	A	17:g.59924523G>A	ENST00000259008.2:c.566C>T	0.27		21	56		55	44	44732		Uncertain_significance
Uterine Corpus Endometrial Carcinoma (TCGA, PanCancer Atlas)	TCGA-E6-A1LX-01	Endometrial Carcinoma	L810I	OncoKB: NA;CIViC: NA;MyCancerGenome: not present;CancerHotspot: no;3DHotspot: no	MutationAssessor: NA;SIFT: impact: deleterious, score: 0.03;Polyphen-2: impact: possibly_damaging, score: 0.84	Missense_Mutation	SNP	Diploid		.	.	.	17	59793376	59793376	G	T	17:g.59793376G>T	ENST00000259008.2:c.2428C>A	0.13		12	81		76	12757	17/20
Uterine Corpus Endometrial Carcinoma (TCGA, PanCancer Atlas)	TCGA-E6-A1LX-01	Endometrial Carcinoma	K318T	OncoKB: NA;CIViC: NA;MyCancerGenome: not present;CancerHotspot: no;3DHotspot: no	MutationAssessor: NA;SIFT: impact: deleterious, score: 0.04;Polyphen-2: impact: probably_damaging, score: 0.984	Missense_Mutation	SNP	Diploid		.	.	.	17	59878801	59878801	T	G	17:g.59878801T>G	ENST00000259008.2:c.953A>C	0.14		5	31		44	12757	44793
Uterine Corpus Endometrial Carcinoma (TCGA, PanCancer Atlas)	TCGA-EO-A22U-01	Endometrial Carcinoma	K318T	OncoKB: NA;CIViC: NA;MyCancerGenome: not present;CancerHotspot: no;3DHotspot: no	MutationAssessor: NA;SIFT: impact: deleterious, score: 0.04;Polyphen-2: impact: probably_damaging, score: 0.984	Missense_Mutation	SNP	Diploid		.	.	.	17	59878801	59878801	T	G	17:g.59878801T>G	ENST00000259008.2:c.953A>C	0.44		23	29		30	13875	44793
Uterine Corpus Endometrial Carcinoma (TCGA, PanCancer Atlas)	TCGA-E6-A1M0-01	Endometrial Carcinoma	S644A	OncoKB: NA;CIViC: NA;MyCancerGenome: not present;CancerHotspot: no;3DHotspot: no	MutationAssessor: NA;SIFT: impact: deleterious, score: 0;Polyphen-2: impact: probably_damaging, score: 0.998	Missense_Mutation	SNP	Diploid	1	.	.	.	17	59857627	59857627	A	C	17:g.59857627A>C	ENST00000259008.2:c.1930T>G	0.23		8	27		62	1743	13/20
Uterine Corpus Endometrial Carcinoma (TCGA, PanCancer Atlas)	TCGA-EO-A22U-01	Endometrial Carcinoma	N734H	OncoKB: NA;CIViC: NA;MyCancerGenome: not present;CancerHotspot: no;3DHotspot: no	MutationAssessor: NA;SIFT: impact: deleterious, score: 0;Polyphen-2: impact: possibly_damaging, score: 0.473	Missense_Mutation	SNP	Diploid		.	.	.	17	59821850	59821850	T	G	17:g.59821850T>G	ENST00000259008.2:c.2200A>C	0.41		29	41		29	13875	15/20
Uterine Corpus Endometrial Carcinoma (TCGA, PanCancer Atlas)	TCGA-EY-A1GD-01	Endometrial Carcinoma	E1145A	OncoKB: NA;CIViC: NA;MyCancerGenome: not present;CancerHotspot: no;3DHotspot: no	MutationAssessor: NA;SIFT: impact: deleterious_low_confidence, score: 0.01;Polyphen-2: impact: possibly_damaging, score: 0.767	Missense_Mutation	SNP	Diploid		.	.	.	17	59760973	59760973	T	G	17:g.59760973T>G	ENST00000259008.2:c.3434A>C	0.08		3	34		44	1083	20/20
Uterine Corpus Endometrial Carcinoma (TCGA, PanCancer Atlas)	TCGA-EY-A1GI-01	Endometrial Carcinoma	K890Q	OncoKB: NA;CIViC: NA;MyCancerGenome: not present;CancerHotspot: no;3DHotspot: no	MutationAssessor: NA;SIFT: impact: tolerated, score: 0.11;Polyphen-2: impact: benign, score: 0.351	Missense_Mutation	SNP	Diploid		.	.	.	17	59763434	59763434	T	G	17:g.59763434T>G	ENST00000259008.2:c.2668A>C	0.53		10	9		27	4511	19/20
Uterine Corpus Endometrial Carcinoma (TCGA, PanCancer Atlas)	TCGA-EY-A1GI-01	Endometrial Carcinoma	E818D	OncoKB: NA;CIViC: NA;MyCancerGenome: not present;CancerHotspot: no;3DHotspot: no	MutationAssessor: NA;SIFT: impact: tolerated, score: 0.07;Polyphen-2: impact: benign, score: 0.309	Missense_Mutation	SNP	Diploid		.	.	.	17	59793350	59793350	T	G	17:g.59793350T>G	ENST00000259008.2:c.2454A>C	0.49		42	44		73	4511	17/20
Uterine Corpus Endometrial Carcinoma (TCGA, PanCancer Atlas)	TCGA-EY-A1GU-01	Endometrial Carcinoma	W647C	OncoKB: NA;CIViC: NA;MyCancerGenome: not present;CancerHotspot: no;3DHotspot: no	MutationAssessor: NA;SIFT: impact: deleterious, score: 0;Polyphen-2: impact: probably_damaging, score: 1	Missense_Mutation	SNP	Diploid		.	.	.	17	59853918	59853918	C	A	17:g.59853918C>A	ENST00000259008.2:c.1941G>T	0.56		9	7		12	1195	14/20		Uncertain_significance
Uterine Corpus Endometrial Carcinoma (TCGA, PanCancer Atlas)	TCGA-EY-A215-01	Endometrial Carcinoma	A877T	OncoKB: NA;CIViC: NA;MyCancerGenome: not present;CancerHotspot: no;3DHotspot: no	MutationAssessor: NA;SIFT: impact: deleterious, score: 0.03;Polyphen-2: impact: probably_damaging, score: 0.999	Missense_Mutation	SNP	Diploid		.	.	.	17	59763473	59763473	C	T	17:g.59763473C>T	ENST00000259008.2:c.2629G>A	0.36		8	14		43	4662	19/20
Uterine Corpus Endometrial Carcinoma (TCGA, PanCancer Atlas)	TCGA-EY-A5W2-01	Endometrial Carcinoma	C942Y	OncoKB: NA;CIViC: NA;MyCancerGenome: not present;CancerHotspot: no;3DHotspot: no	MutationAssessor: NA;SIFT: impact: tolerated_low_confidence, score: 0.98;Polyphen-2: impact: benign, score: 0.005	Missense_Mutation	SNP	Diploid		.	.	.	17	59763277	59763277	C	T	17:g.59763277C>T	ENST00000259008.2:c.2825G>A	0.14		8	49		65	779	19/20		Uncertain_significance
