# Supplementary material for: Spectrum of BRCA1 interacting helicase 1 aberrations and potential prognostic and therapeutic implication: a pan cancer analysis
Source: Sci Rep. 2023 Mar 17;13:4435. doi: 10.1038/s41598-023-31109-6 (PMC10023799; doi:10.1038/s41598-023-31109-6)
Supplement: Supplementary file 3 — Supplementary Table S2. [file 41598_2023_31109_MOESM3_ESM.xlsx]

## Sheet: 工作表1
Supplementary Table S2. Distribution of BRIP1 mutations in different protein domains for cancers with BRIP1 mutations and all tumors collectively.
	DEAD-2 domain	Helicase-C-2 domain	Others
Pan-cancer	33	38	159
BLCA	2	2	17
BRCA	0	2	9
CESC	1	2	6
COAD	4	3	18
ESAD	1	0	3
GBM	1	1	3
HNSC	4	3	6
KIRC	0	1	2
LIHC	0	1	2
LUAD	2	4	12
LUSC	0	2	1
MESO	1	0	0
OV	4	0	2
PAAD	0	0	1
PRAD	1	0	2
SARC	0	0	1
SKCM	4	3	21
STAD	2	1	5
THCA	0	0	1
UCEC	6	13	47
